# Supplementary material for: Diatoms synthesize sterols by inclusion of animal and fungal genes in the plant pathway
Source: PubMed Central journal article supplement (PMC7060231; doi:10.1038/s41598-020-60993-5), 2020-03-06
Supplement: 41598_2020_60993_MOESM1_ESM.pdf [file 41598_2020_60993_MOESM1_ESM.pdf]

# SUPPLEMENTARY INFORMATION

**Diatoms synthesize sterols by inclusion of animal and fungal genes in the plant pathway**

**Carmela Gallo<sup>1</sup>, Simone Landi<sup>1,2</sup>, Giuliana d'Ippolito<sup>1</sup>, Genoveffa Nuzzo<sup>1</sup>, Emiliano Manzo<sup>1</sup>,  
Angela Sardo<sup>1,3</sup>, Angelo Fontana<sup>1</sup>**

<sup>1</sup> **National Research Council of Italy, Institute of Biomolecular Chemistry, Bio-Organic Chemistry Unit, Via Campi Flegrei 34, 80078 Pozzuoli (Napoli), Italy.**

<sup>2</sup> **Univeristy of Naples "Federico II", Department of Biology, Cupa Nuova Cintia 21 , 80126 Napoli, Italy**

<sup>3</sup> **Stazione Zoologica "A. Dohrn", Villa Comunale, 80121 Napoli, Italy**

**Supplementary Table 1:** Sterol composition of centric and pennate diatoms based on the 5-cholesten skeleton

| Diatom species                                  | Phytosterols                                                                      |                                                                                   |                                                                                   |                                                                                   |                                                                                    | Animal sterols                                                                      |                                                                                     |
|-------------------------------------------------|-----------------------------------------------------------------------------------|-----------------------------------------------------------------------------------|-----------------------------------------------------------------------------------|-----------------------------------------------------------------------------------|------------------------------------------------------------------------------------|-------------------------------------------------------------------------------------|-------------------------------------------------------------------------------------|
|                                                 | 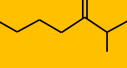 |  |  |  |  |  |  |
| <i>Cyclotella cryptica</i> <sup>a</sup>         |                                                                                   |                                                                                   |                                                                                   |                                                                                   |                                                                                    |                                                                                     |                                                                                     |
| <i>Skeletonema marinoi</i> <sup>a</sup>         |                                                                                   |                                                                                   |                                                                                   |                                                                                   |                                                                                    |                                                                                     |                                                                                     |
| <i>Skeletonema costatum</i> <sup>b</sup>        |                                                                                   |                                                                                   |                                                                                   |                                                                                   |                                                                                    |                                                                                     |                                                                                     |
| <i>Thalassiosira weissflogii</i> <sup>a</sup>   |                                                                                   |                                                                                   |                                                                                   |                                                                                   |                                                                                    |                                                                                     |                                                                                     |
| <i>Pseudonitzschia arenysensis</i> <sup>a</sup> |                                                                                   |                                                                                   |                                                                                   |                                                                                   |                                                                                    |                                                                                     |                                                                                     |
| <i>Phaeodactylum tricornutum</i> <sup>a</sup>   |                                                                                   |                                                                                   |                                                                                   |                                                                                   |                                                                                    |                                                                                     |                                                                                     |
| <i>Phaeodactylum tricornutum</i> <sup>b</sup>   |                                                                                   |                                                                                   |                                                                                   |                                                                                   |                                                                                    |                                                                                     |                                                                                     |
| <i>Thalassiosira pseudonana</i> <sup>b</sup>    |                                                                                   |                                                                                   |                                                                                   |                                                                                   |                                                                                    |                                                                                     |                                                                                     |
| <i>Cylindrotheca closterium</i> <sup>b</sup>    |                                                                                   |                                                                                   |                                                                                   |                                                                                   |                                                                                    |                                                                                     |                                                                                     |
| <i>Fragilariopsis cylindrus</i> <sup>b</sup>    |                                                                                   |                                                                                   |                                                                                   |                                                                                   |                                                                                    |                                                                                     |                                                                                     |

<sup>a</sup>Current study; <sup>b</sup>In agreement with *Limnol. Oceanogr.*, 55(1), 2010, 91–105

**Supplementary Table 2:** List of main identified orthologs obtained using nodal sterol pathway translated sequences from *S. marinoi* and *C. cryptica* compared vs *T. oceanica*, *T. pseudonana*, *F. cylindrus*, *P. tricornutum*, *PN. multistriata* and *C. crispus* genomes. In addition, the sequence of the ERG2 from *Saccharomyces cerevisiae* was used as further query.

|                                                     |        | Main identified orthologs in sequenced genomes of marine diatoms |          |                     |          |                    |          |                      |          |                        |          |                  |          |
|-----------------------------------------------------|--------|------------------------------------------------------------------|----------|---------------------|----------|--------------------|----------|----------------------|----------|------------------------|----------|------------------|----------|
| Sterol biosynthesis key genes                       |        | <i>T.oceanica</i>                                                | Identity | <i>T.pseudonana</i> | Identity | <i>F.cylindrus</i> | Identity | <i>P.tricornutum</i> | Identity | <i>PN.multistriata</i> | Identity | <i>C.crispus</i> | Identity |
| <i>HMG-CoA synthase</i>                             | HMGS   | EJK77540.1                                                       | 84%      | XP_002286567.1      | 87%      | OEU16766.1         | 72%      | XP_002185047.1       | 65%      | VEU40541.1             | 65%      | XP_005712048.1   | 37%      |
| <i>HMG-CoA reductase</i>                            | HMGR   | EJK68891.1                                                       | 73%      | XP_002289576.1      | 89%      | OEU16221.1         | 78%      | XP_002185302.1       | 74%      | not determined         |          | not determined   |          |
| <i>Mevalonate kinase</i>                            | MEVK   | EJK44829.1                                                       | 75%      | XP_002287787.1      | 83%      | OEU13577.1         | 69%      | XP_002177012.1       | 26%      | VEU38327.1             | 69%      | XP_005711370.1   | 37%      |
| <i>Squalene synthase</i>                            | SQS    | EJK68341.1                                                       | 77%      | XP_002288355.1      | 88%      | OEU14974.1         | 70%      | XP_002180940.1       | 72%      | VEU34553.1             | 65%      | XP_005712480.1   | 36%      |
| <i>Cycloartenol synthase</i>                        | CAS    | EJK52279.1                                                       | 64%      | XP_002287432.1      | 85%      | OEU13816.1         | 68%      | XP_002185678.1       | 71%      | VEU33723.1             | 57%      | XP_005715573.1   | 45%      |
| <i>Cycloartenol-C-24-methyltransferase</i>          | SMT1   | EJK49936.1                                                       | 37%      | XP_002287743.1      | 69%      | OEU12190.1         | 50%      | XP_002178531.1       | 42%      | VEU39293.1             | 26%      | XP_005710912.1   | 25%      |
| <i>Cycloeucaleanol cycloisomerase</i>               | CPI    | EJK52525.1                                                       | 68%      | XP_002291862.1      | 72%      | OEU13221.1         | 52%      | XP_002184217.1       | 59%      | VEU40796.1             | 52%      | XP_005714180.1   | 41%      |
| <i>Sterol 14 demethylase</i>                        | CYP    | EJK78043.1                                                       | 81%      | XP_002289823.1      | 91%      | OEU16403.1         | 59%      | XP_002185538.1       | 65%      | VEU38469.1             | 61%      | XP_005711653.1   | 46%      |
| <i>Delta 14 sterol reductase</i>                    | CYP    | EJK57401.1                                                       | 34%      | XP_002287678.1      | 74%      | OEU08604.1         | 56%      | XP_002183899.1       | 35%      | VEU34167.1             | 51%      | XP_005715240.1   | 33%      |
| <i>C8 sterol isomerase (ScERG2)</i>                 | ERG2   |                                                                  |          |                     |          |                    |          |                      |          |                        |          | XP_005718833.1   | 47%      |
| <i>C-5 sterol desaturase</i>                        | DWF7   | EJK66009.1                                                       | 38%      | XP_002295550.1      | 80%      | OEU21245.1         | 51%      | XP_002179834.1       | 55%      | VEU39255.1             | 65%      | XP_005719132.1   | 30%      |
| <i>7 dehydrocholesterol reductase</i>               | DWF5   | EJK73338.1                                                       | 76%      | XP_002289717.1      | 79%      | OEU22434.1         | 70%      | XP_002184305.1       | 38%      | VEU39255.1             | 63%      | XP_005719145.1   | 34%      |
| <i>24 dehydrocholesterol reductase (Sm-TR10988)</i> | DHCR24 |                                                                  |          |                     |          | OEU21854.1         | 43%      |                      |          | VEU38364.1             | 42%      | XP_005713924.1   | 35%      |
| <i>Delta(24(24(1)))-sterol reductase</i>            | 24SR   | EJK57400.1                                                       | 30%      | XP_002287183.1      | 31%      | OEU08604.1         | 35%      | XP_002182735.1       | 32%      | VEU34167.1             | 31%      | XP_005715240.1   | 29%      |

**Supplementary Table 3:** Comparison analysis of plants, fungal, yeast and human enzymes involved key reaction of sterol synthesis vs the *S. marinoi* and *C. cryptica* sequenced transcriptomes. Resulted hits showing alignment query coverage  $\leq 39\%$  were considered not significant and dark grey highlighted.

| Organisms                        | Descriptions                                      | Genes     | Best BLAST hit    |                         |                    |                         |
|----------------------------------|---------------------------------------------------|-----------|-------------------|-------------------------|--------------------|-------------------------|
|                                  |                                                   |           | <i>S. marinoi</i> | Statistics              | <i>C. cryptica</i> | Statistics              |
| <i>Arabidopsis thaliana</i>      | <i>Squalene epoxidase</i>                         | SQE1      | No hit            |                         | No hit             |                         |
| <i>Homo sapiens</i>              | <i>Squalene epoxidase</i>                         | SQE       | No hit            |                         | No hit             |                         |
| <i>Pheodactylum tricornutum</i>  | <i>Alternative squalene epoxidase</i>             | AltSQE    | TR7561            | QC = 58% I = 25% P= 42% | TR29442            | QC = 50% I = 26% P= 43% |
| <i>Arabidopsis thaliana</i>      | <i>Cycloarthenol synthase</i>                     | CAS1      | TR12960           | QC = 86% I = 47% P= 64% | TR3126             | QC = 86% I = 48% P= 64% |
| <i>Neurospora crassa</i>         | <i>Lanosterol synthase</i>                        | LSS       |                   | QC = 92% I = 38% P= 54% |                    | QC = 86% I = 39% P= 55% |
| <i>Homo sapiens</i>              | <i>Lanosterol synthase</i>                        | LSS       |                   | QC = 89% I = 44% P= 60% |                    | QC = 90% I = 45% P= 60% |
| <i>Aspergillus nidulans</i>      | <i>Lanosterol synthase</i>                        | LSS       |                   | QC = 87% I = 32% P= 49% |                    | QC = 87% I = 32% P= 48% |
| <i>Arabidopsis thaliana</i>      | <i>Sterol 14 demethylase</i>                      | CYP10A1   | TR7602            | QC = 76% I = 25% P= 43% | TR12199            | QC = 77% I = 25% P= 41% |
| <i>Arabidopsis thaliana</i>      | <i>Sterol 14 demethylase</i>                      | CYP10A2   |                   | QC = 41% I = 29% P= 48% |                    | QC = 42% I = 30% P= 31% |
| <i>Arabidopsis thaliana</i>      | <i>C8-sterol isomerase</i>                        | AT1G05440 | TR11754           | QC = 15% I = 23% P= 51% | No hit             |                         |
| <i>Arabidopsis thaliana</i>      | <i>C8-sterol isomerase</i>                        | HYD1      | TR27203           | QC = 24% I = 23% P= 55% | TR38445            | QC = 23% I = 41% P= 50% |
| <i>Saccharomyces cerevisiae</i>  | <i>C8-sterol isomerase</i>                        | ERG2      | TR4901            | QC = 22% I = 29% P= 57% | TR41732            | QC = 18% I = 32% P= 51% |
| <i>Aspergillus nidulans</i>      | <i>C8-sterol isomerase</i>                        | ERG2      | TR2164            | QC = 12% I = 42% P= 70% | TR9781             | QC = 19% I = 36% P= 54% |
| <i>Neurospora crassa</i>         | <i>C8-sterol isomerase</i>                        | ERG2      | TR4901            | QC = 22% I = 29% P= 57% | TR17006            | QC = 21% I = 27% P= 45% |
| <i>Arabidopsis thaliana</i>      | <i>Sterol methyltransferase 1</i>                 | SMT1      | TR612             | QC = 89% I = 46% P= 65% | TR44522            | QC = 98% I = 43% P= 53% |
| <i>Chlamydomonas reinhardtii</i> | <i>Sterol methyltransferase</i>                   | SMT1-2    | TR612             | QC = 84% I = 38% P= 53% | TR45147            | QC = 84% I = 40% P= 53% |
| <i>Arabidopsis thaliana</i>      | <i>Sterol methyl-oxidase</i>                      | SMO1-1    | TR11964           | QC = 62% I = 27% P= 43% | TR32604            | QC = 60% I = 31% P= 45% |
| <i>Arabidopsis thaliana</i>      | <i>Sterol methyl-oxidase</i>                      | SMO1-2    | TR30213           | QC = 81% I = 26% P= 45% |                    | QC = 80% I = 23% P= 42% |
| <i>Arabidopsis thaliana</i>      | <i>Sterol methyl-oxidase</i>                      | SMO1-3    | TR11964           | QC = 70% I = 27% P= 45% |                    | QC = 56% I = 30% P= 45% |
| <i>Arabidopsis thaliana</i>      | <i>Sterol methyl-oxidase</i>                      | SMO2-1    | TR319             | QC = 84% I = 23% P= 40% |                    | QC = 58% I = 25% P= 52% |
| <i>Arabidopsis thaliana</i>      | <i>Sterol methyl-oxidase</i>                      | SMO2-2    | TR28078           | QC = 78% I = 28% P= 46% |                    | QC = 59% I = 33% P= 52% |
| <i>Homo sapiens</i>              | <i>C4 methyl sterol oxidase</i>                   | SMO       | TR11964           | QC = 86% I = 25% P= 43% |                    | QC = 75% I = 24% P= 45% |
| <i>Saccharomyces cerevisiae</i>  | <i>Sterol-4-alpha-carboxylate 3-dehydrogenase</i> | ERG26     | TR28078           | QC = 98% I = 25% P= 42% | TR14638            | QC = 98% I = 29% P= 48% |

|                                 |                                                          |        |         |                         |         |                         |
|---------------------------------|----------------------------------------------------------|--------|---------|-------------------------|---------|-------------------------|
| <i>Homo sapiens</i>             | <i>3-beta-hydroxysteroid-Delta(8),Delta(7)-isomerase</i> | EBP    | No hit  |                         | No hit  |                         |
| <i>Arabidopsis thaliana</i>     | <i>C5-sterol desaturase</i>                              | DWF7   | TR28093 | QC = 58% I = 23% P= 42% | TR48724 | QC = 51% I = 25% P= 43% |
| <i>Homo sapiens</i>             | <i>C5-sterol desaturase</i>                              | SC5D   | TR28093 | QC = 79% I = 25% P= 43% | TR48724 | QC = 48% I = 32% P= 43% |
| <i>Arabidopsis thaliana</i>     | <i>7-dehydrocholesterol reductase</i>                    | DWF5   | TR2636  | QC = 86% I = 40% P= 55% | TR24068 | QC = 86% I = 41% P= 56% |
| <i>Homo sapiens</i>             | <i>24-dehydrocholesterol reductase</i>                   | DHCR24 | TR10998 | QC = 95% I = 50% P= 67% | TR28124 | QC = 24% I = 25% P= 44% |
| <i>Arabidopsis thaliana</i>     | <i>Delta 24 sterol reductase</i>                         | DWF1   |         | QC = 92% I = 37% P= 54% |         | QC = 11% I = 33% P= 52% |
| <i>Solanum lycopersicum</i>     | <i>Sterol side chain reductase</i>                       | SSR2   |         | QC = 92% I = 39% P= 53% |         | QC = 25% I = 25% P= 42% |
| <i>Physalis alkekengi</i>       | <i>Delta 24 sterol reductase</i>                         | 24ISO  |         | QC = 91% I = 39% P= 53% |         | QC = 23% I = 25% P= 45% |
| <i>Saccharomyces cerevisiae</i> | <i>Delta 24(24) sterol reductase</i>                     | ERG4   | TR213   | QC = 94% I = 43% P= 59% | TR29411 | QC = 93% I = 43% P= 58% |
| <i>Saccharomyces cerevisiae</i> | <i>Delta 22 sterol desaturase</i>                        | ERG5   | TR7602  | QC = 69% I = 22% P= 49% | TR3228  | QC = 40% I = 28% P= 43% |

**Supplementary Figure 1:** NMR (600 MHz, CDCl<sub>3</sub>) identification of clionasterol from *S. marinoi* and *C. cryptica*. (A) Comparison of <sup>1</sup>H NMR upfield-shifted signals of standard β-sitosterol and the natural 24 ethyl sterol isolated from the diatoms; (B) <sup>1</sup>H-NMR data of clionasterol and β-sitosterol, and comparison with the literature assignment (Nes *et al.* Lipids (1976) 11: 118).

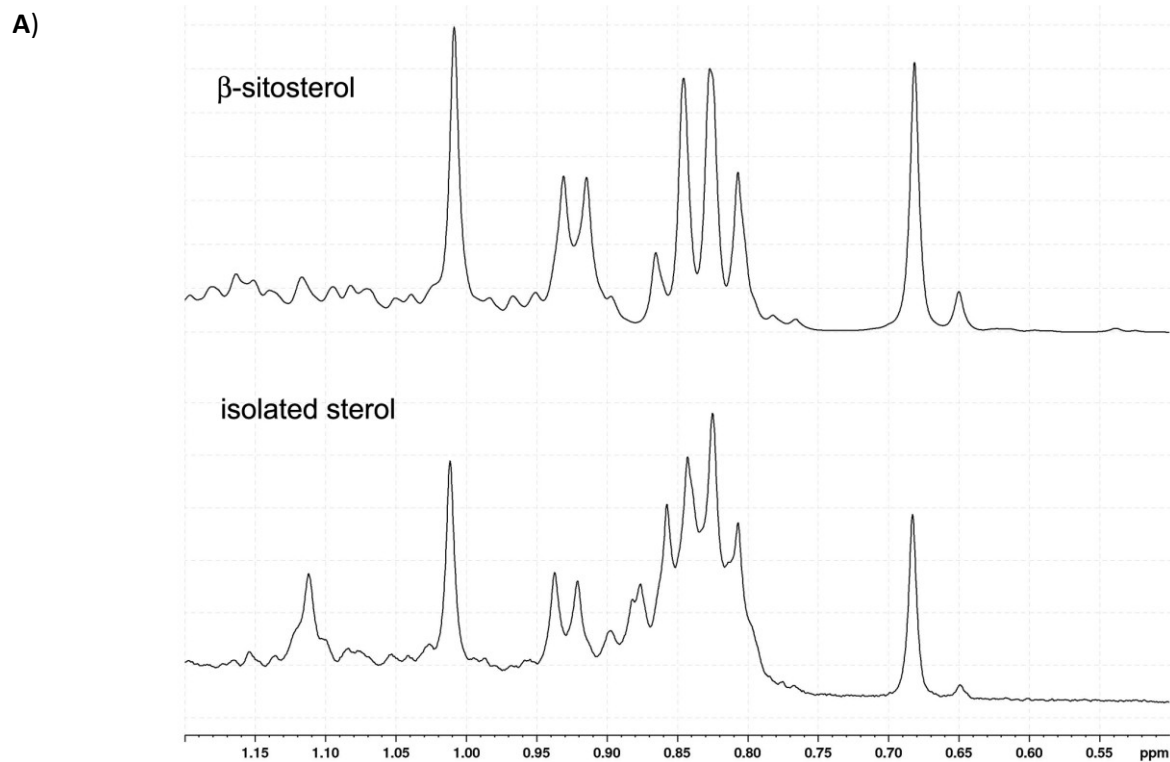

B)

| Positions | Experimental data         |                           | Literature data |              |
|-----------|---------------------------|---------------------------|-----------------|--------------|
|           | Clionasterol <sup>a</sup> | β-Sitosterol <sup>b</sup> | Clionasterol    | β-Sitosterol |
| 18        | 0.6800                    | 0.6826                    | 0.6818          | 0.6818       |
| 19        | 1.0090                    | 1.0090                    | 1.0090          | 1.0090       |
| 21        | 0.9247                    | 0.9243                    | 0.9272          | 0.9227       |
| 26        | 0.8308                    | 0.8371                    | 0.8318          | 0.8364       |
| 27        | 0.8106                    | 0.8163                    | 0.8091          | 0.8136       |
| 29        | 0.8578                    | 0.8462                    | 0.8545          | 0.8454       |

<sup>a</sup> sample isolated from *C. cryptica*; <sup>b</sup> standard.

**Supplementary Figure 2:** Incorporation of 1-<sup>13</sup>C-glucose into dihydrobrassicasterol of *C. cryptica*. Enriched carbons are shown by a red spot on the structure. **(A)** Full and **(B-D)** four enlarged regions of the <sup>13</sup>C-NMR spectra (CDCl<sub>3</sub>, 125 MHz) of labeled (top trace) and unlabeled (down trace) dihydrobrassicasterol. Intensity of <sup>13</sup>C signals of labeled and unlabeled spectra are normalized on C14 (56.79 ppm).

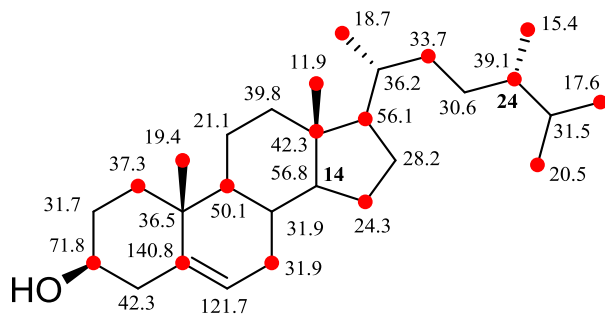

**A)** Full spectral width (155-0 ppm).

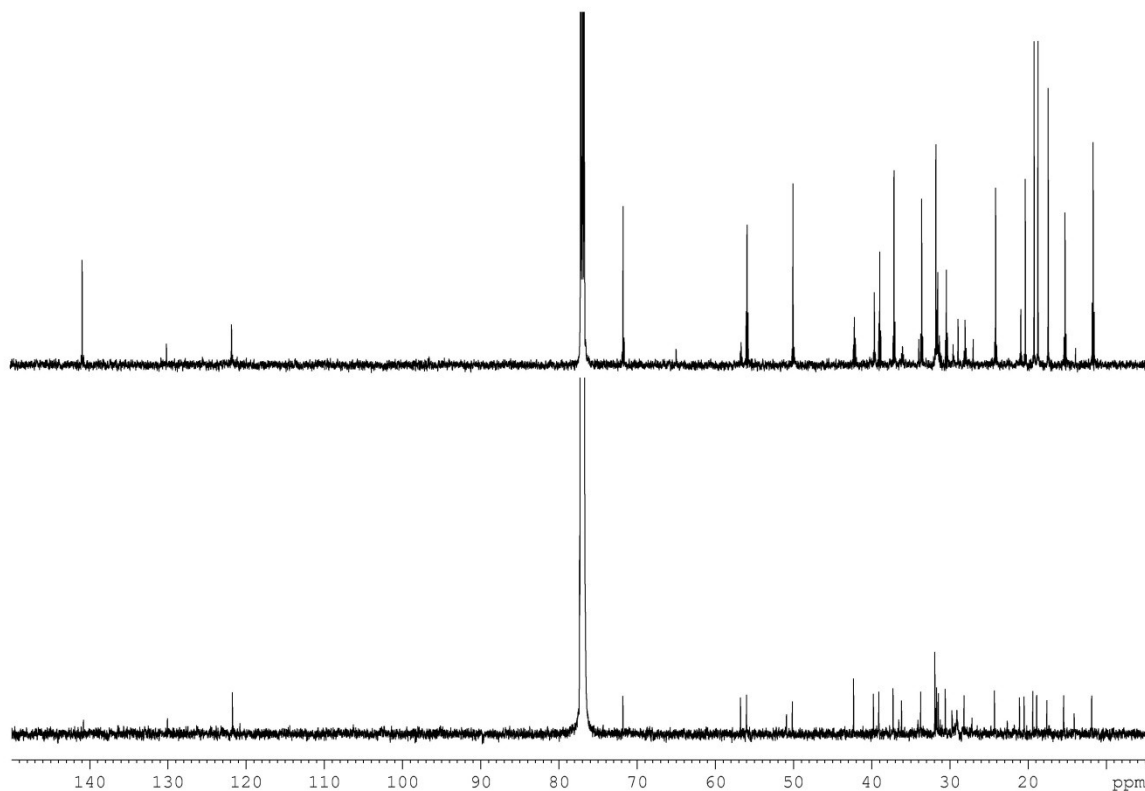

**B) Region between 35 and 10 ppm.**

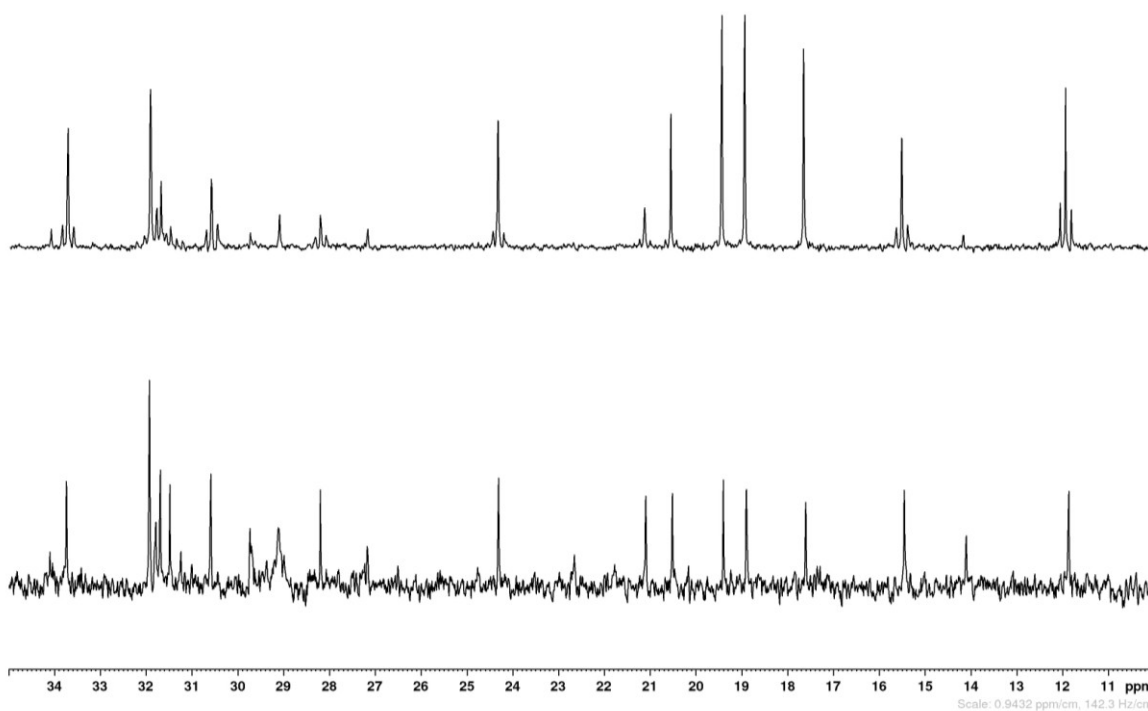

**C) Region between 60 and 35 ppm.**

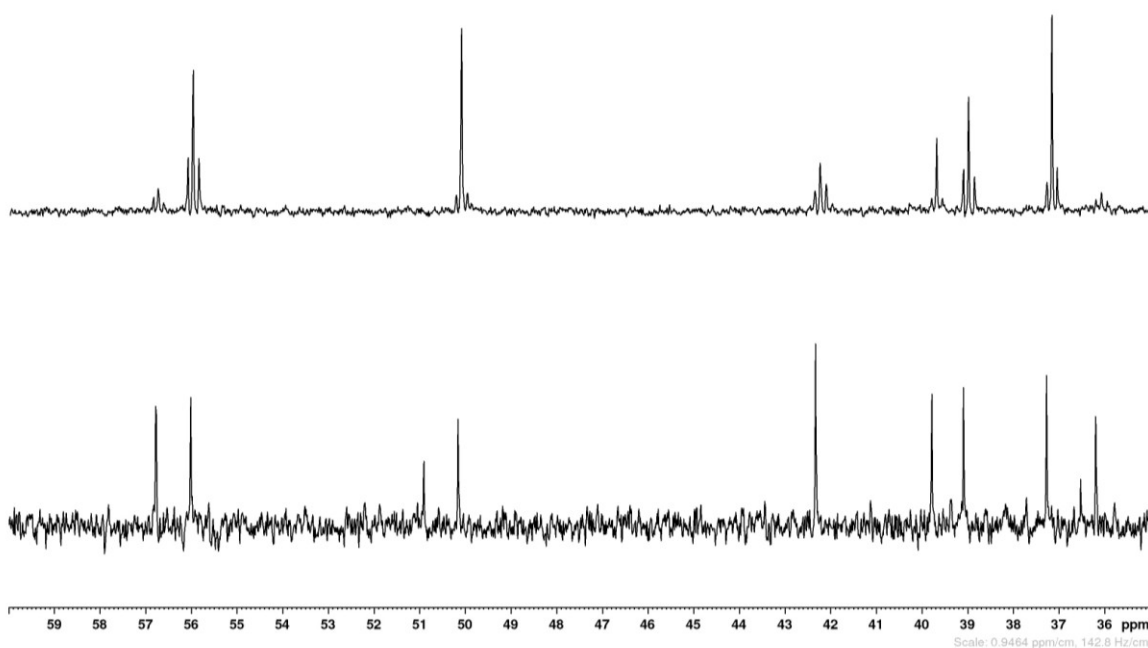



D) Region between 85 and 60 ppm.

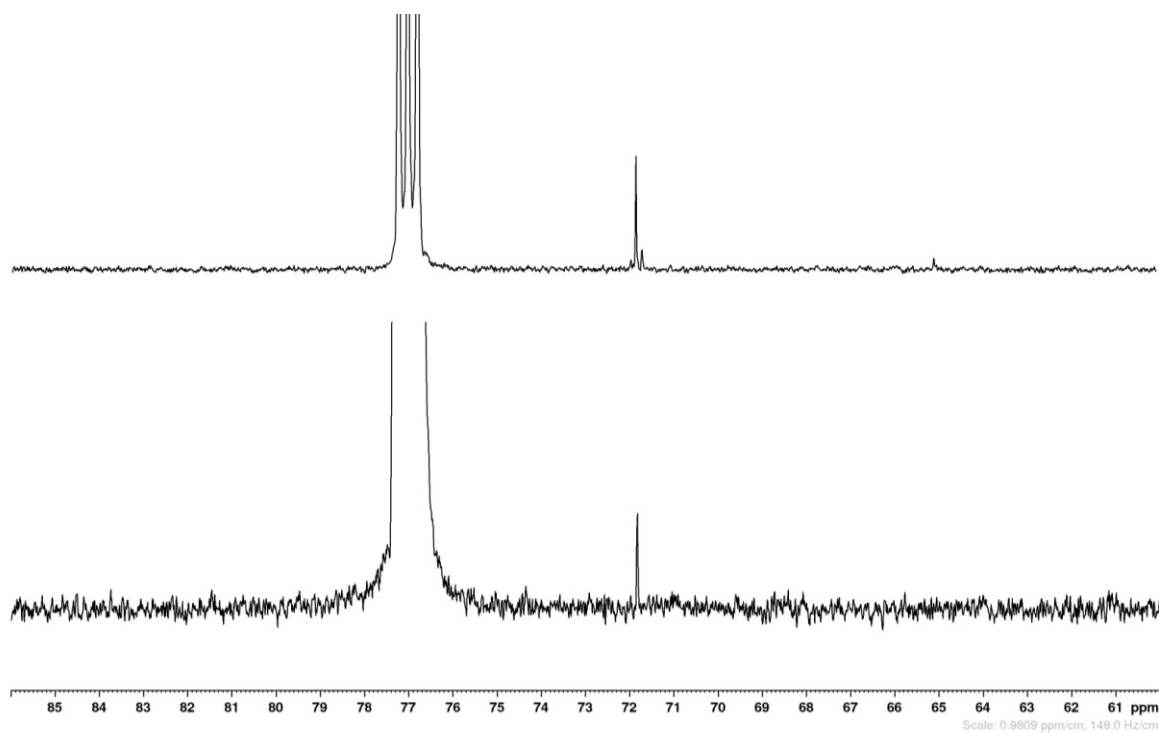

E) Region between 144 and 118 ppm

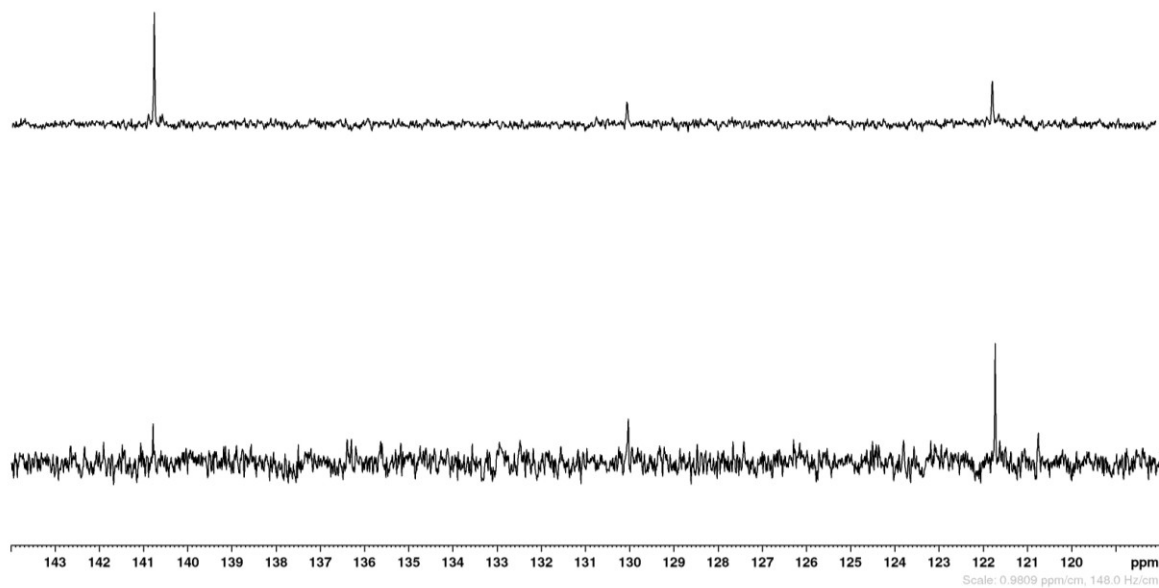

**Supplementary Figure 3:** Incorporation of 1-<sup>13</sup>C glucose into fucosterol of *C. cryptica*. Enriched carbons are shown by a red spot on the structure. **(A)** Full and **(B-D)** enlarged regions of the <sup>13</sup>C-NMR spectra (CDCl<sub>3</sub>, 125 MHz) of labeled (top trace) and unlabeled (down trace) fucosterol. Intensity of <sup>13</sup>C signals of labeled and unlabeled spectra are normalized on C14 (56.79 ppm).

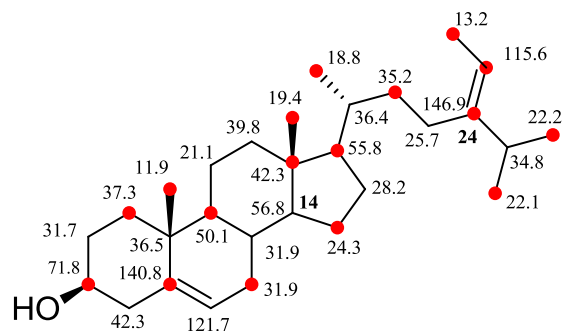

**A)** Full spectral width (160-0 ppm).

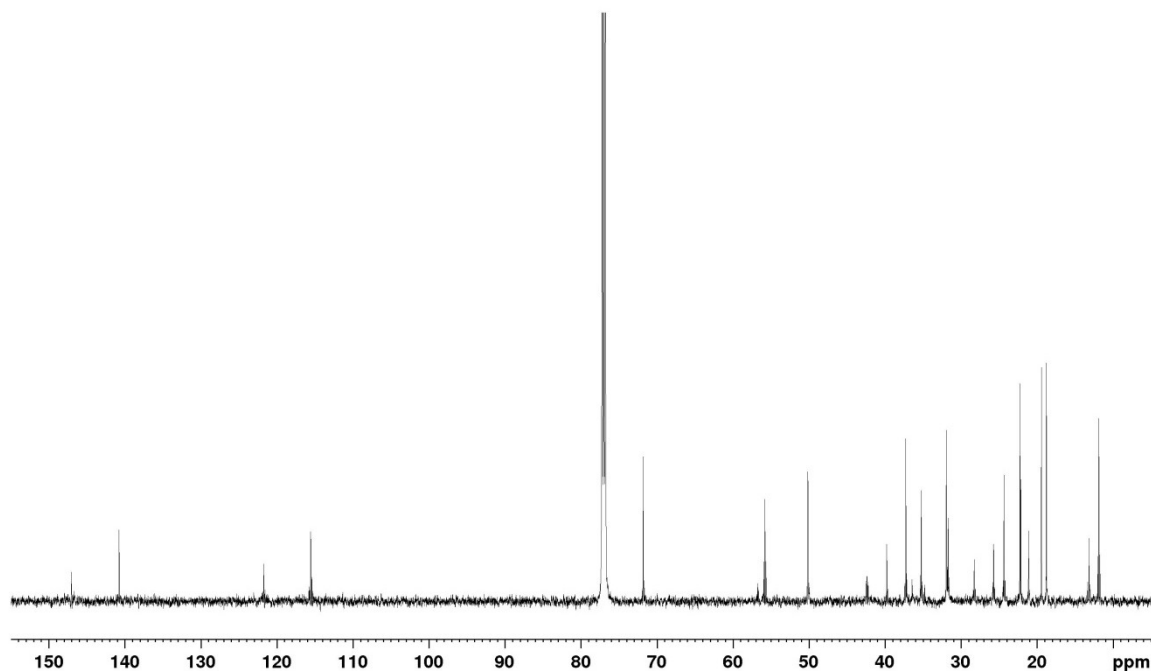

B) Region between 35 and 10 ppm.

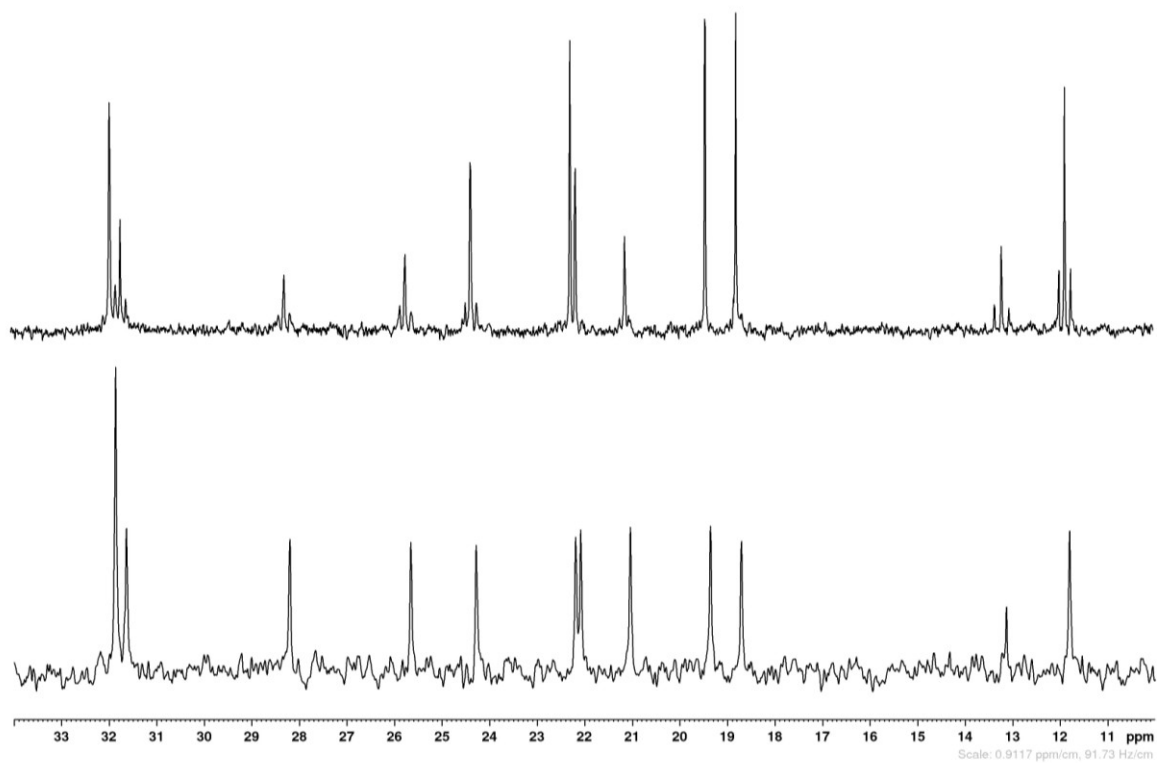

C) Region between 60 and 35 ppm.

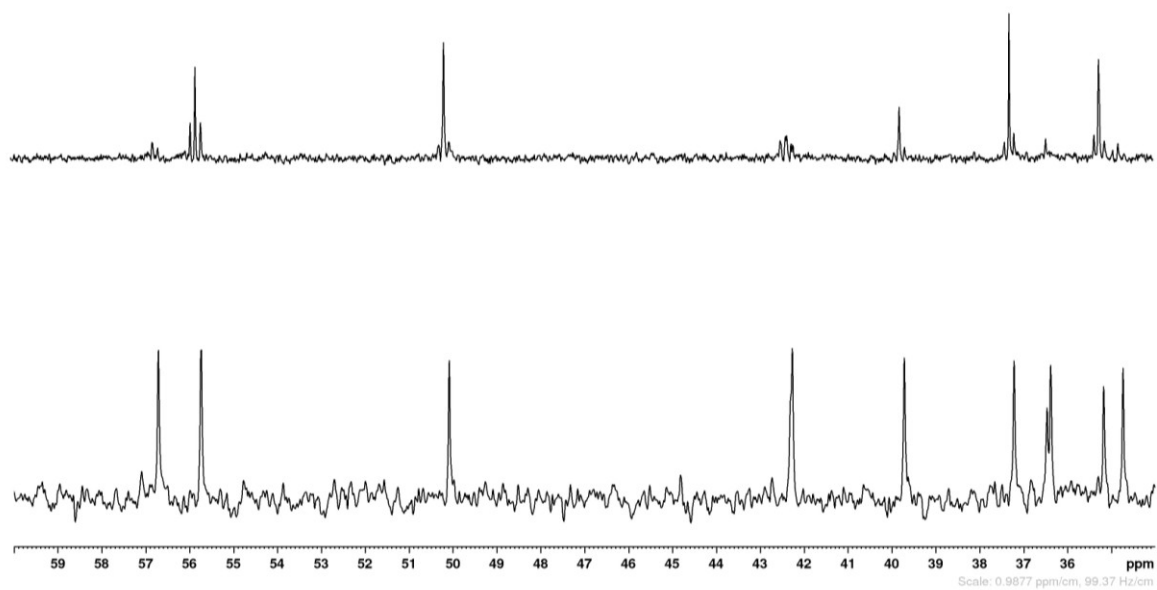

D) Region between 85 and 60 ppm.

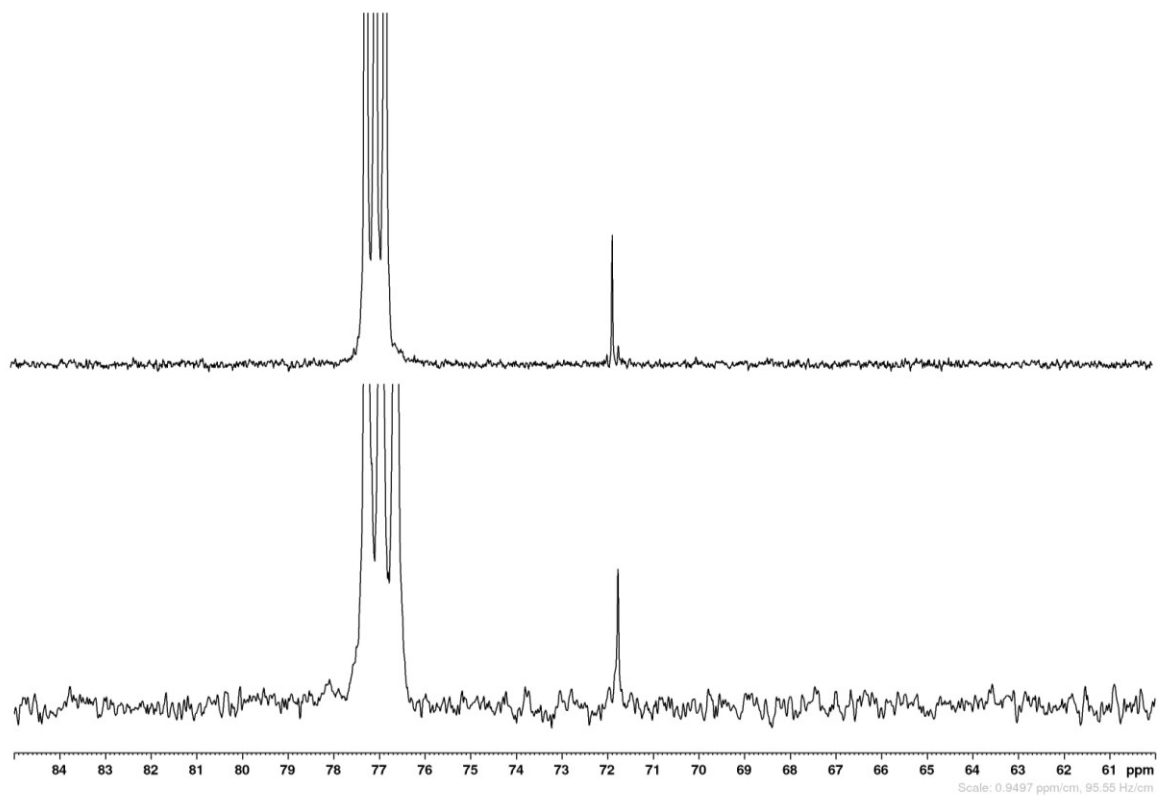

E) Region between 150 and 110 ppm.

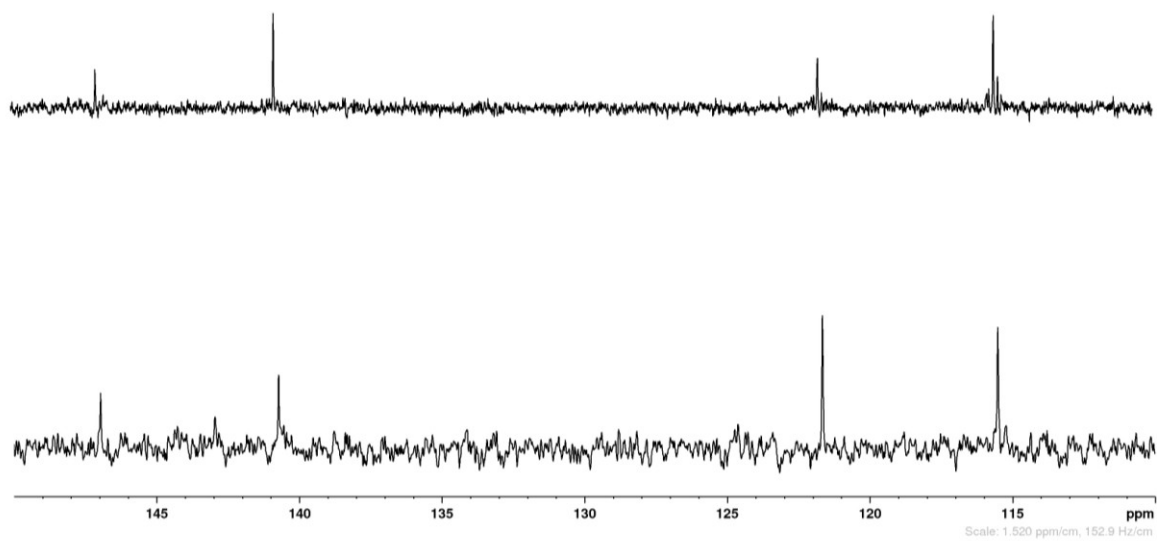

**Supplementary Figure 4:** Incorporation of 1-<sup>13</sup>C glucose into clionasterol of *C. cryptica*. Enriched carbons are shown by a red spot on the structure. **(A)** Full and **(B-D)** enlarged regions of the <sup>13</sup>C-NMR spectra (CDCl<sub>3</sub>, 125 MHz) of labeled clionasterol.

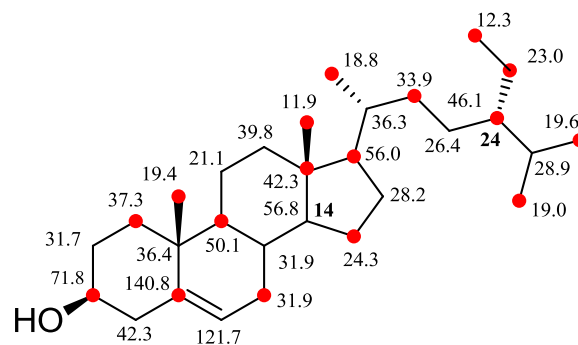

**A)** Full spectral width (160-0 ppm).

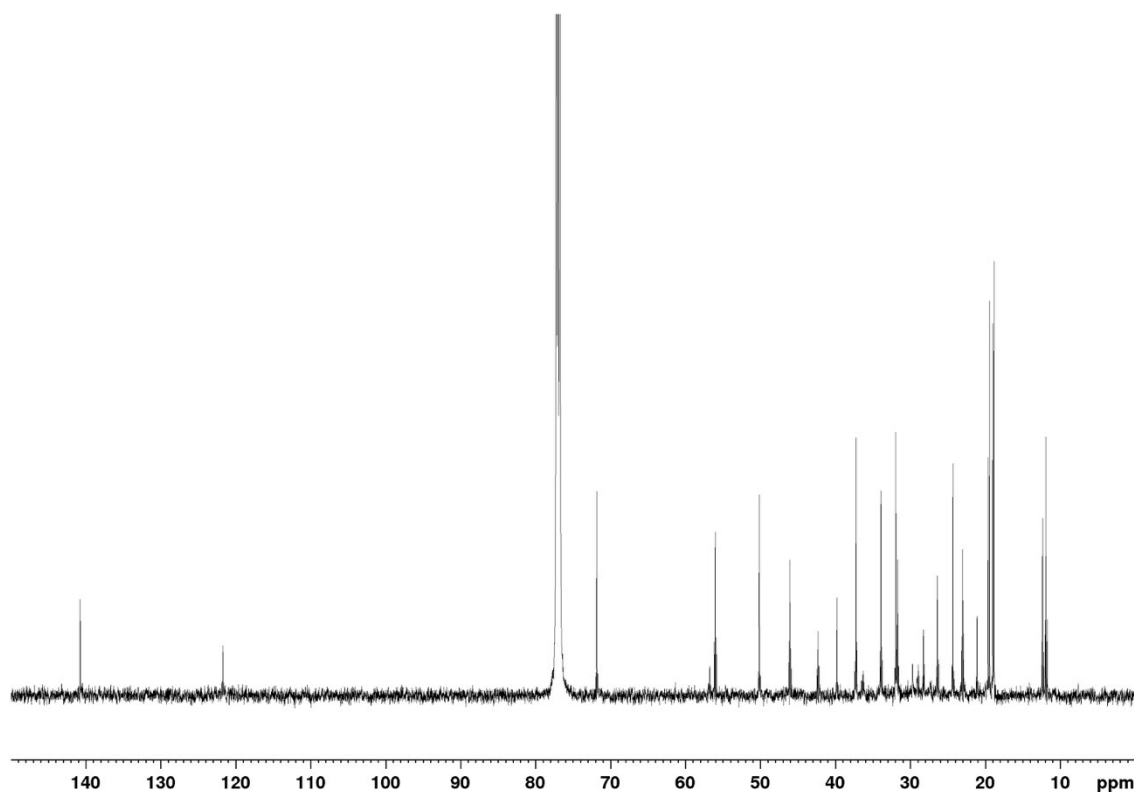

B) Region between 35 and 10 ppm.

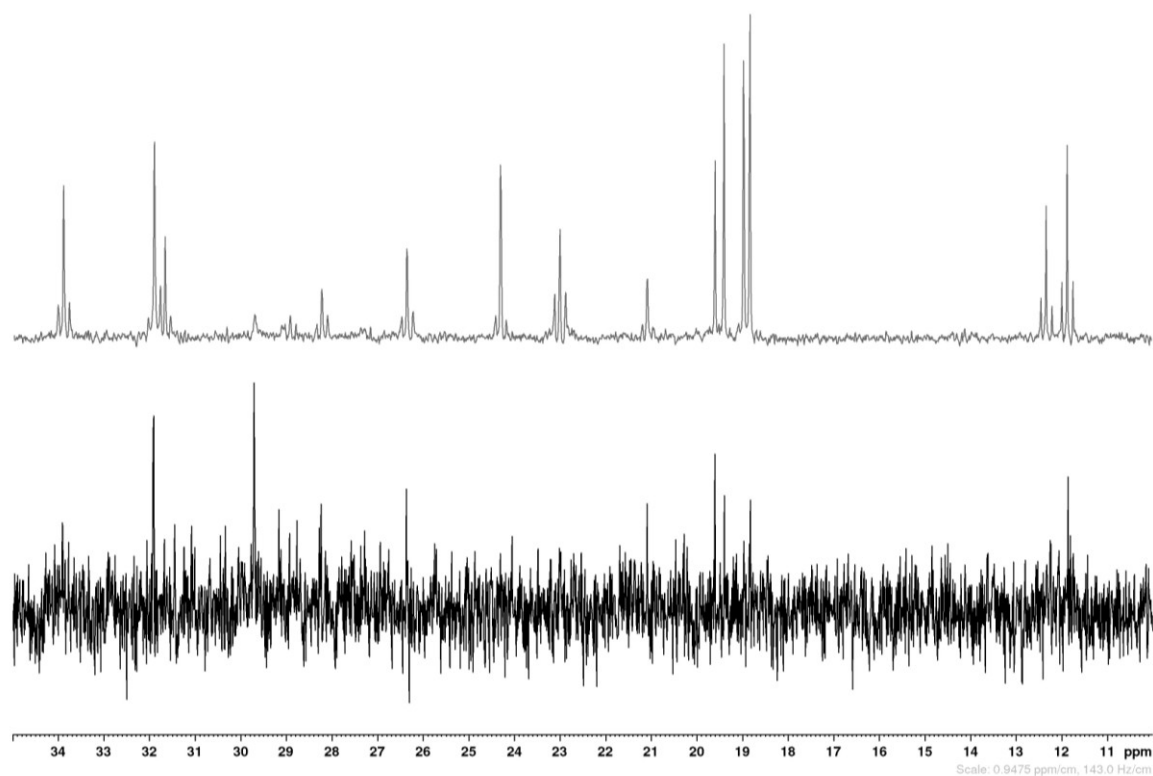

C) Region between 60 and 35 ppm.

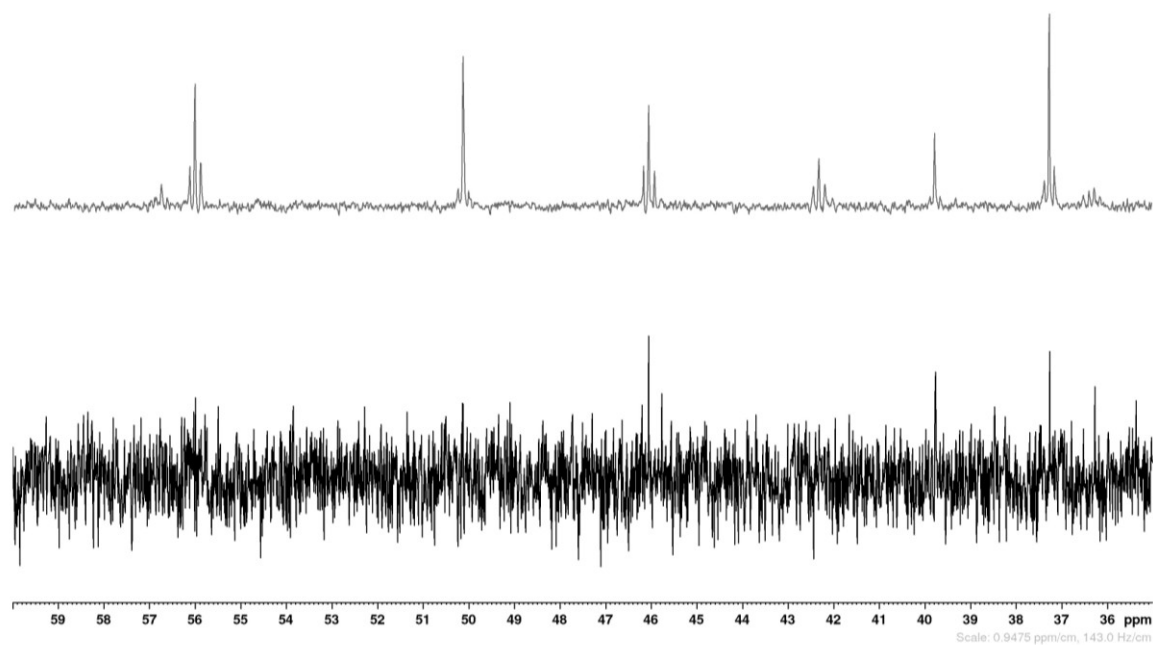

D) Region between 85 and 60 ppm.

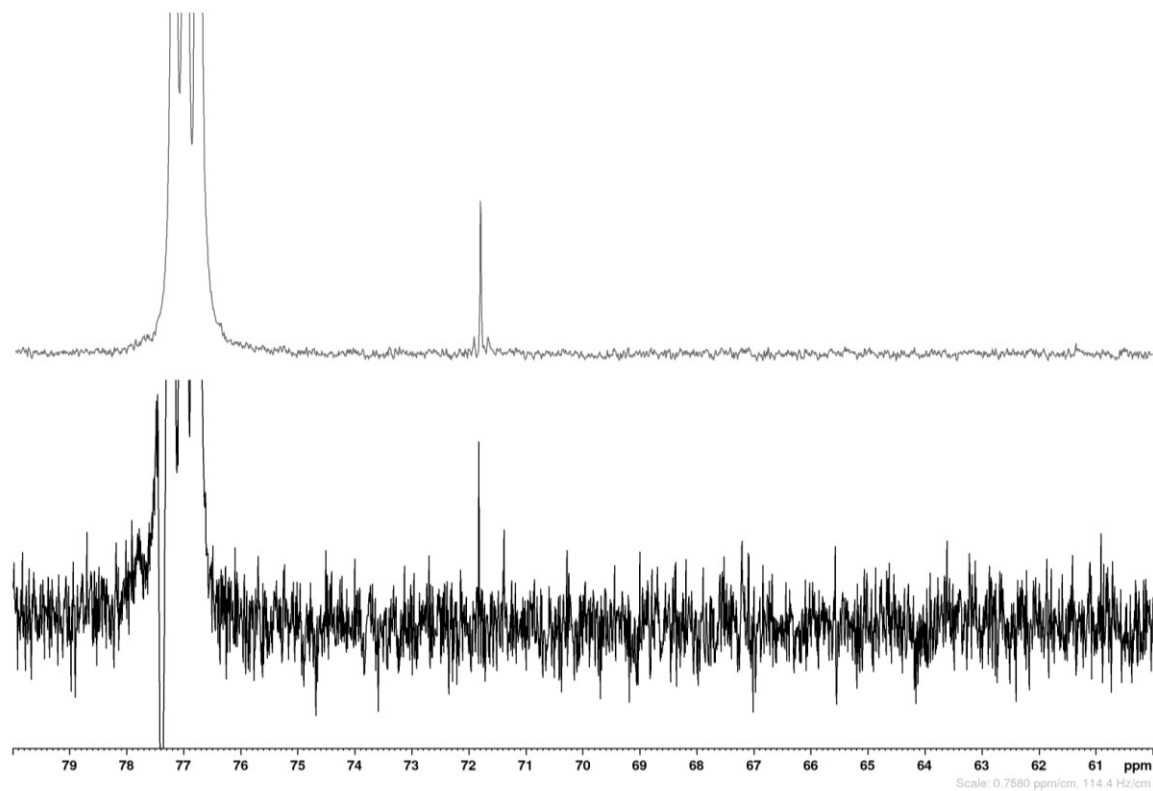

E) Region between 145 and 118 ppm.

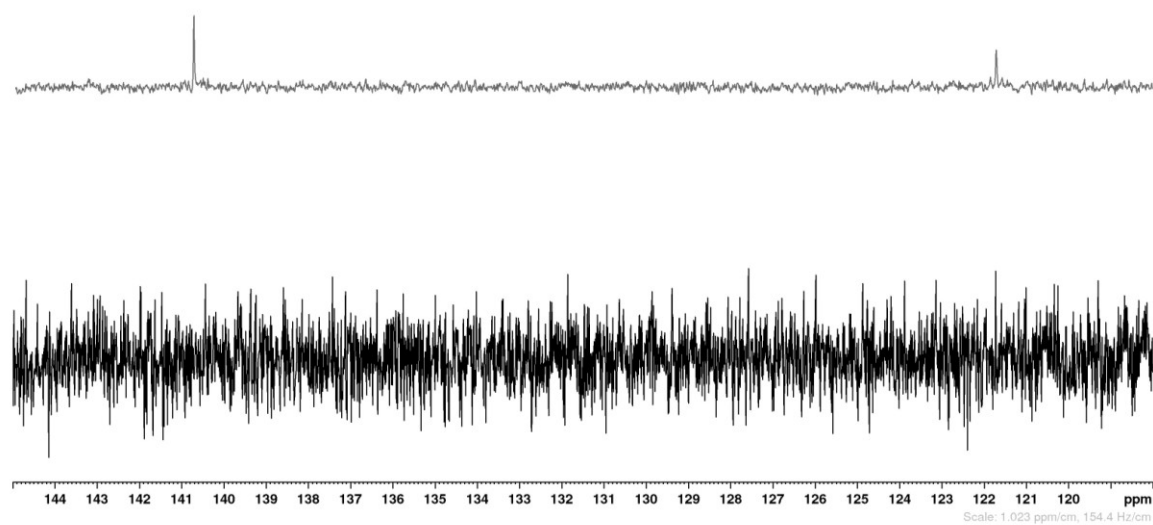

**Supplementary Figure 5:** Alignment of amino acid sequences of the catalytic region of the putative proteins of *S. marinoi* and *C. cryptica* with homologous regions from CAS and LSS in animals, yeast and fungi.

```

A.nidulans_LSS      342  DSNDLTNSTGVSVD AFLNMI AFYC--KEGPD SKALRRIQTASLEYLWMGPRGMQVMSIH 399
H.sapiens_LSS      325  ADDRFTKSI SIGPI SKTINMLV RWY--VDGPASTAFQEHVSRI PDYLWMLDGMKMQGTTN 382
A.thaliana_CAS1    355  YEDENTRYICIGPVNKV LNMLCCWV---EDPNSEAFKLHLPRIHDFLWLAEDGMKMQGYN 411
A.thaliana_CAS2    264  YEDENTRYICIGPVNKV LNMLCCWV---EDPNSEAFKLHLPRIHDFLWLAEDGMKMQGYN 320
S.marinoi_CAS      776  AEDLQTNFIDIGPVNKALNMVSAFHSANNDINDPAVRSHMMRPDYLWVAEDGMKMQGYN 835
C.criptica_CAS     299  AEDLQTNFYIDIGPVNKALNMVAAYHAANNNDINDPAVQSHMMRPDYLWLAEDGMKMQGYN 358
N.crassa_LSS       348  MEDENTDYSIDLAPVNAAMNTVCCYV--RDGPGAYSVRRHVERLDEVLWVNAEGMLCNGTIN 405
S.cerevisiae_LSS   328  TELQNTDSL CIAPVNQAF CALVTLI--EEGVDSEAFQRLQYRFKDALPHGPGQGMTIMGTN 385

A.nidulans_LSS     400  AGHTWETA FVLQAYAEGGLSKVPEIQAAIERAYKYLVEQQHV-----VDYPE 446
H.sapiens_LSS      383  GSQLWDTAFAIQALLEAGGHRPEFSSCLQKAHEFLRLSQVP-----DNPP 428
A.thaliana_CAS1    412  GSQLWDTGF AIQAILATNLVE--EYGPVLEKAHSFVKNSQVL-----EDCPG 456
A.thaliana_CAS2    321  GSQLWDTGF AIQAILATNLVE--EYGPVLEKAHSFVKNSQVL-----EDCPG 365
S.marinoi_CAS      836  GSQCWDTSF AIQAVWECGLLD--KFPILSAKVWAFLE RTQILSTEC SQSTPAYQYESC-D 892
C.criptica_CAS     359  GSQCWDTSF AIQAVRECGLLD--HFPLLSTKVWAYLE RTQILSTETSQSSPAFYESC-D 418
N.crassa_LSS       406  GVQCWDTAF AIQAIMDAGLTEDPRWRPMLIKSLEFLEDQQIR-----ENVK 451
S.cerevisiae_LSS   386  GVQTDWCAFAIQYFFVAGLAERPEFYNTIVSAYKFLCHAQFD-----TECVP 432

A.nidulans_LSS     447  DSQCHFFSRL--GGWPFSTRYQGNVCS DCTGEALKSILMIE-RDSRFT-----RLTT 495
H.sapiens_LSS      429  DYQ-KYYRQMRKGGFSFSTLDGWI VSDCTAEALKAVLLLQEKCPHVT-----EHIP 479
A.thaliana_CAS1    457  DLN-YWYRHISKGAWPFSTADHGWPIS DCTAEGLKAALLLS-KVPKEIVG-----EPID 508
A.thaliana_CAS2    366  DLN-YWYRHISKGAWPFSTADHGWPIS DCTAEGLKAALLLS-KVPKAI VG-----EPID 417
S.marinoi_CAS      893  SRD-KFYRHVSKGGWPFSTSAHGWPIS DCTGEGGLKGV LALM-DSPIVMDGVKRGILKDIE 950
C.criptica_CAS     419  NRD-KFYRHVSKGGWPFSTSAHGWPIS DCTGEGGLKGV LALM-NSPIVVEAVKTGV LKSID 473
N.crassa_LSS       452  DQD-KCYRHPRKGAWAFSNKDG YAVSDCVSEALKSVIILQ-KTPGFP-----TLID 501
S.cerevisiae_LSS   433  GS----YDRKRKGAWGFSTKTQGYT VADCTAEAIKAIIMVK-NSPVFSEV-----HHMIS 482

```



**Supplementary Figure 6:** Rooted phylogenetic tree of Sterol Methyl Transferases (SMTs) from various organisms. The bootstrapping test (replicate = 100) is indicated on each node in order to test the phylogeny. Nicotinate methyltransferase (NANMT) was used as outgroup. Red square = *S. marinoi*; Green square = *C. cryptica*; Light blue spot = other diatom.

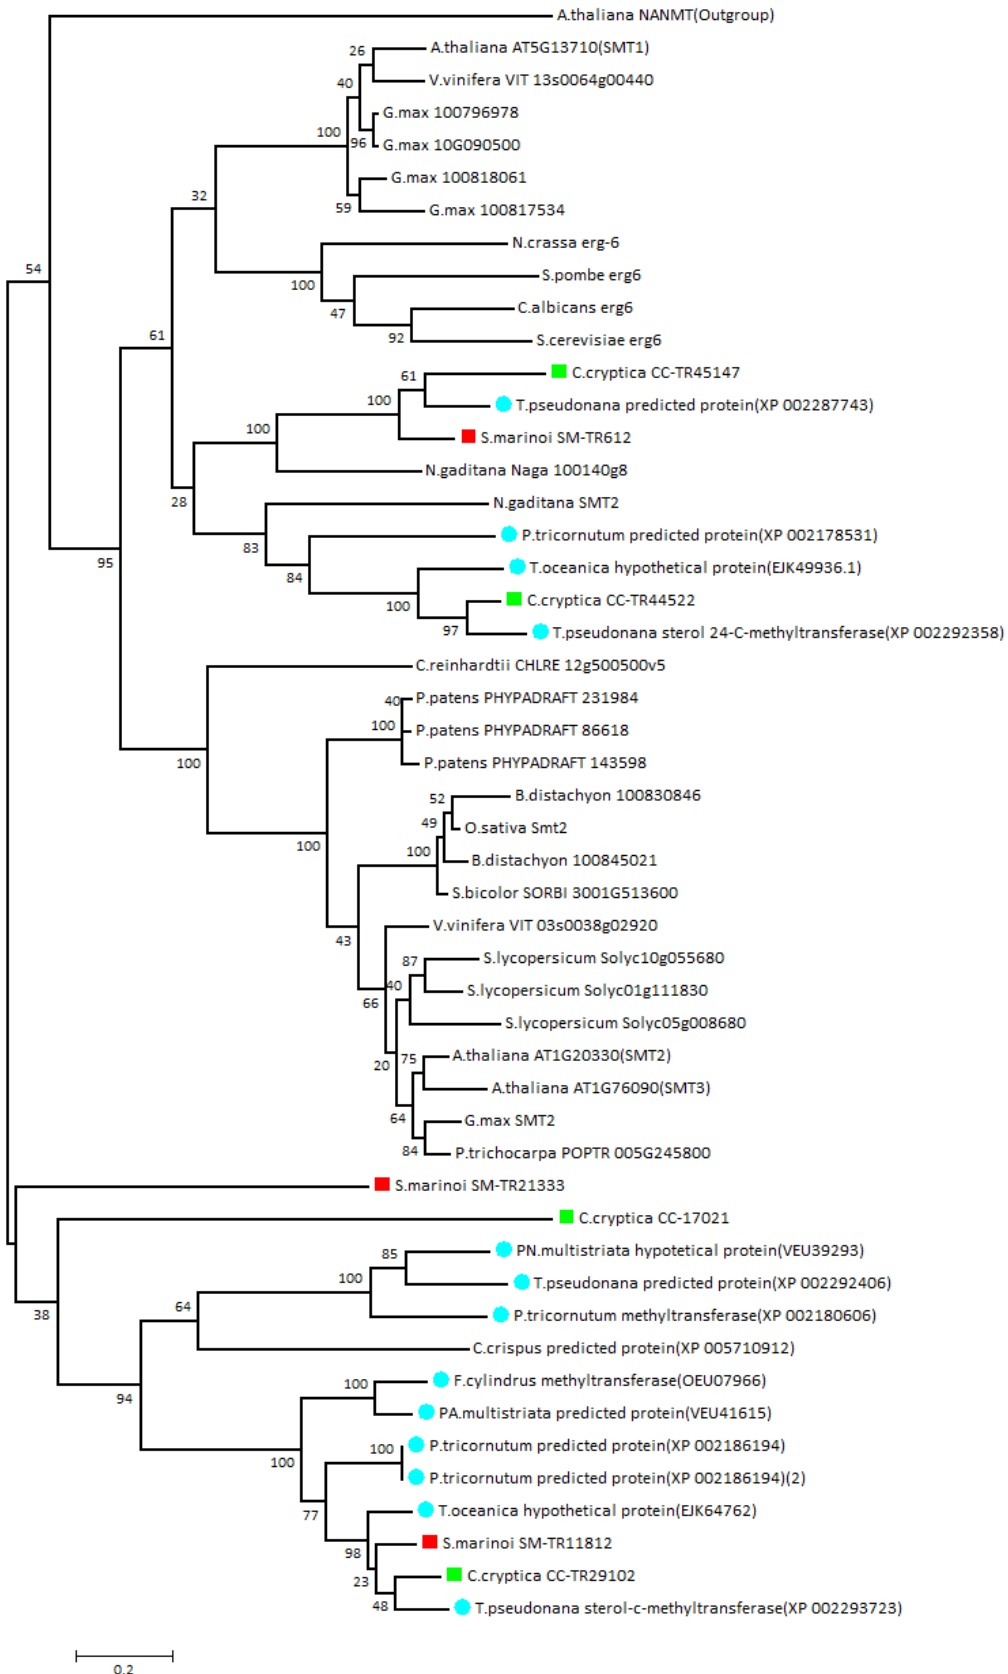

**Supplementary Figure 7:** Un-rooted phylogenetic trees of key enzymes of C5-sterol desaturase, including DWF7 and ERG3, from various organisms. The bootstrapping test (replicate = 100) is indicated on each node in order to test the phylogeny. Red square = *S. marinoi*; Green square = *C. cryptica*; Light blue spot = other diatom.

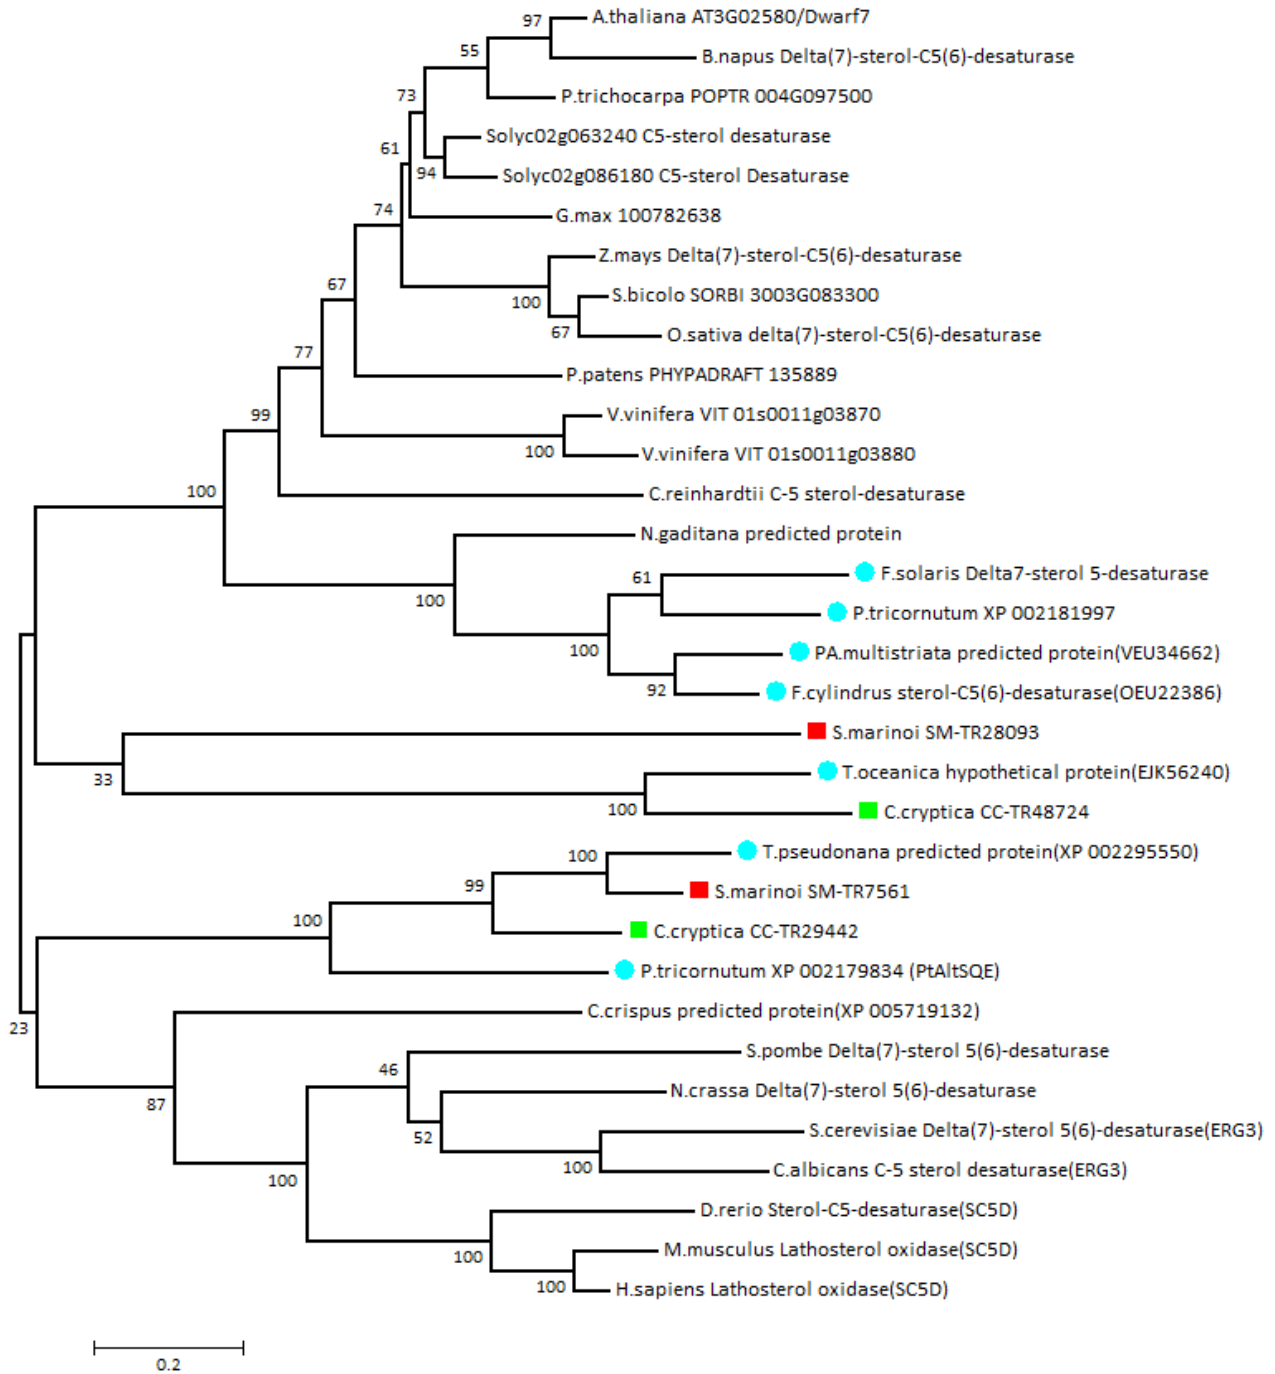

**Supplementary Figure 8:** Un-rooted phylogenetic trees of key enzymes of DWF5, ERG4 and 7 dehydrocholesterol reductase from various organisms. The bootstrapping test (replicate = 100) is indicated on each node in order to test the phylogeny. Red square = *S. marinoi*; Green square = *C. cryptica*; Light blue spot = other diatom.

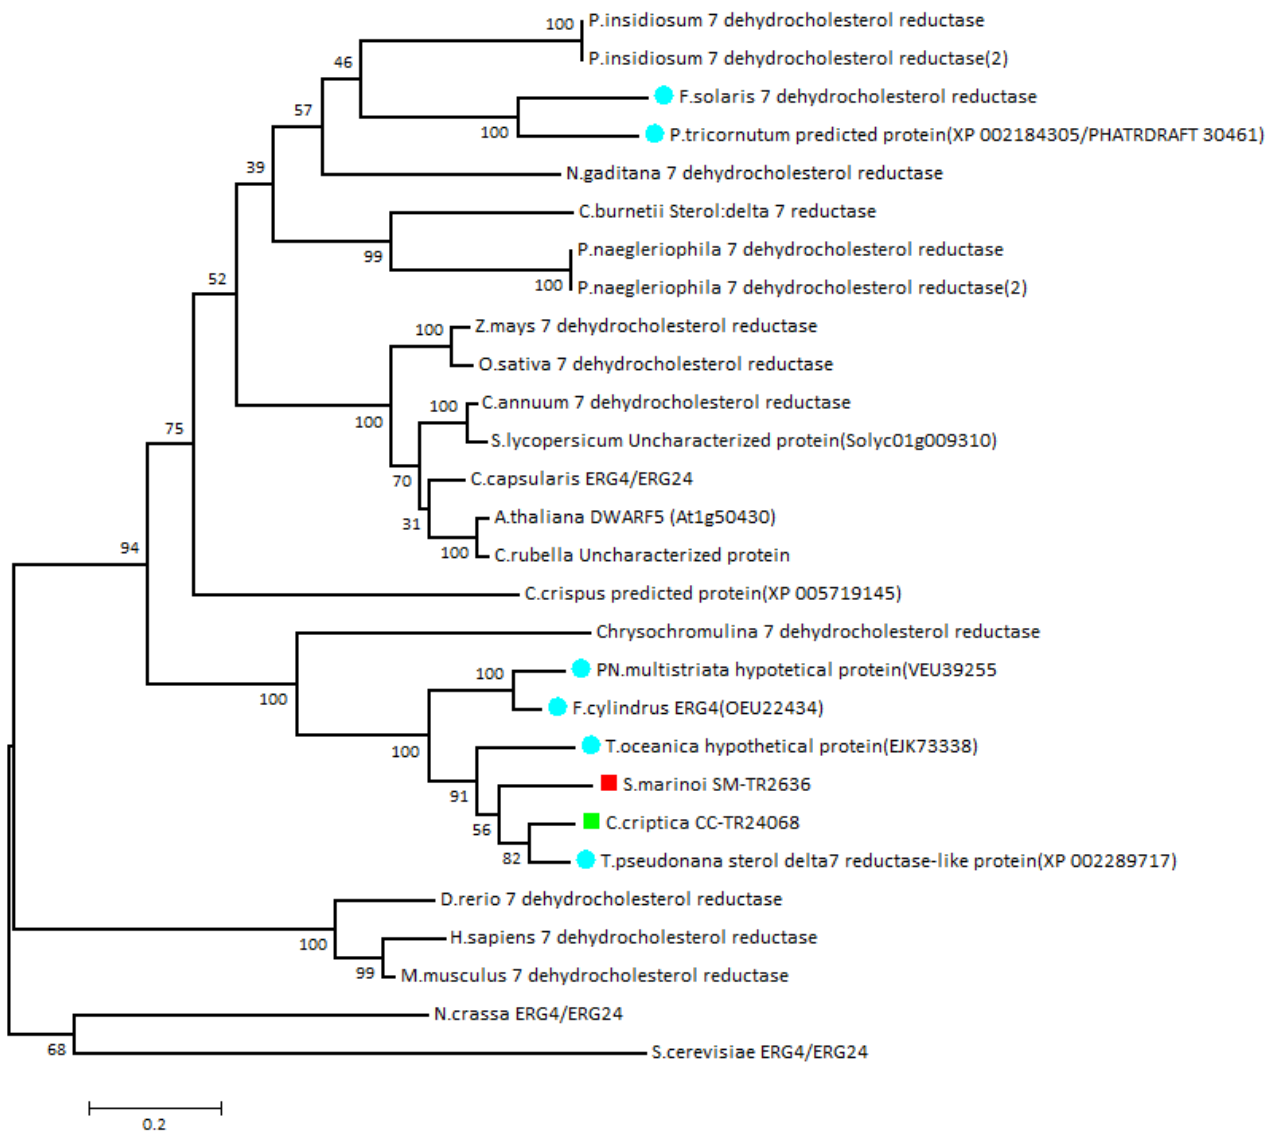

**Supplementary Figure 9:** Alignment of aminoacid sequences of DWF1 from *A. thaliana* and *S. lycopersicum*, SSR2 from *S. lycopersicum* and 24-DHCR from *Homo sapiens* and Sm-TR10998 from *S. marinoi*.

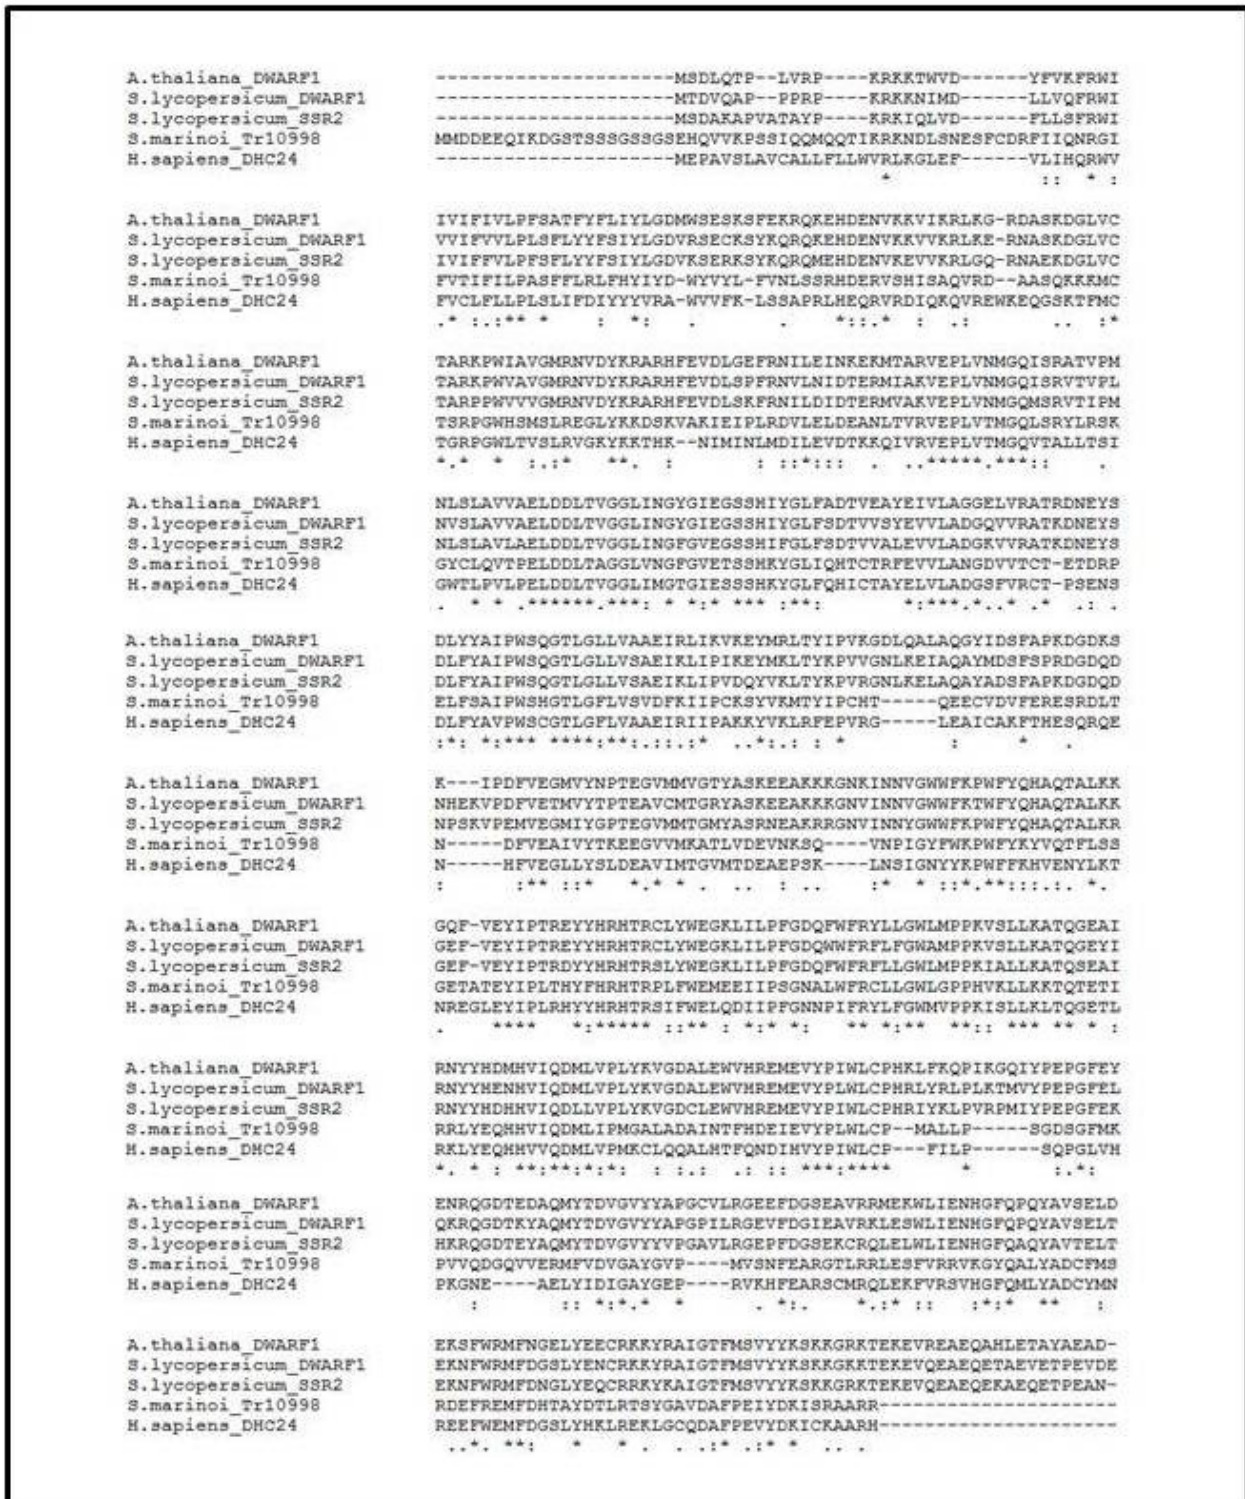

# SUPPORTING MATERIAL

**Diatoms synthesize sterols by inclusion of animal and fungal enzymes in the plant pathway**

**Carmela Gallo<sup>1</sup>, Simone Landi<sup>1,2</sup>, Giuliana d'Ippolito<sup>1</sup>, Genoveffa Nuzzo<sup>1</sup>, Emiliano Manzo<sup>1</sup>,  
Angela Sardo<sup>1,3</sup>, Angelo Fontana<sup>1</sup>**

<sup>1</sup> National Research Council of Italy, Institute of Biomolecular Chemistry, Bio-Organic Chemistry Unit, Via Campi Flegrei 34, 80078 Pozzuoli (Napoli), Italy.

<sup>2</sup> University of Naples "Federico II", Department of Biology, Cupa Nuova Cintia 21, 80126 Napoli, Italy

<sup>3</sup> Stazione Zoologica "A. Dohrn", Villa Comunale, 80121 Napoli, Italy

**FIGURE SM1.**  $^1\text{H}$  NMR spectrum (600 MHz,  $\text{C}_6\text{D}_6$ ) of acetylated 24-methylene cholesterol from *S. marinoi*.

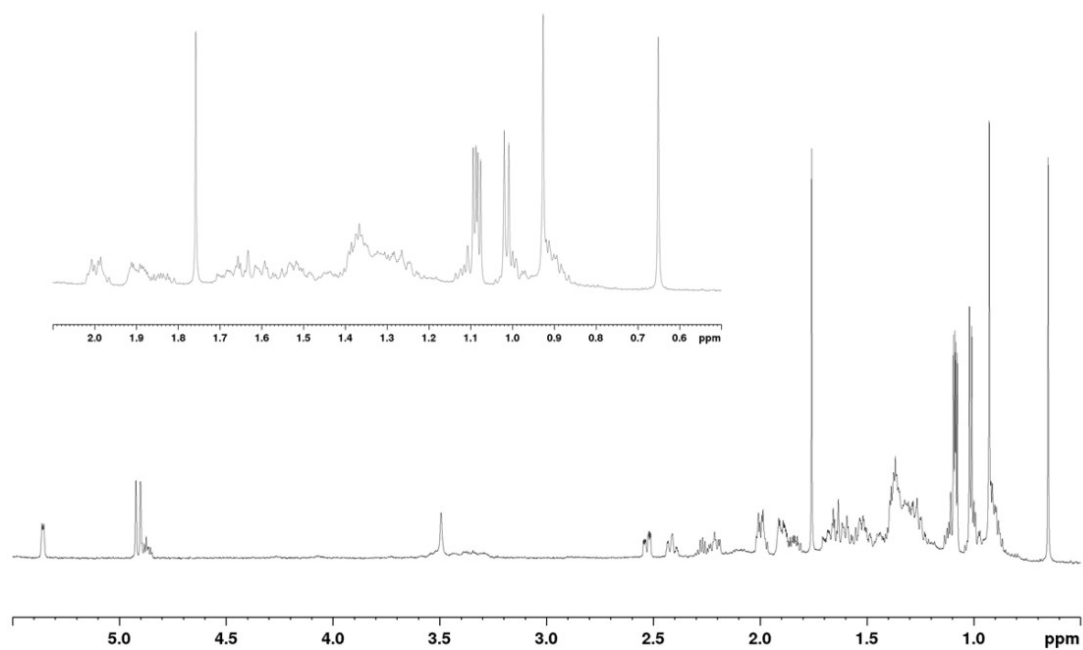

**FIGURE SM2.**  $^1\text{H}$  NMR spectrum (600 MHz,  $\text{CDCl}_3$ ) of natural dihydrobrassicasterol.

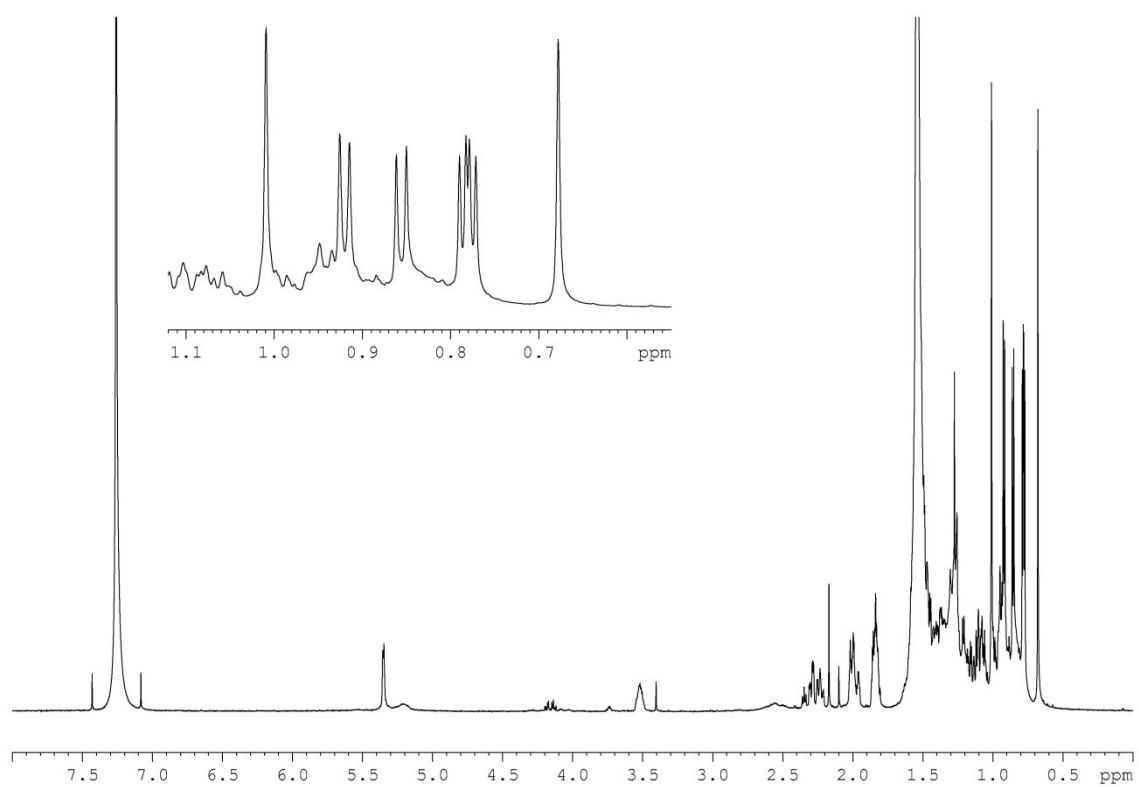

**FIGURE SM3.**  $^{13}\text{C}$  NMR spectrum (125 MHz,  $\text{CDCl}_3$ ) of natural dihydrobrassicasterol.

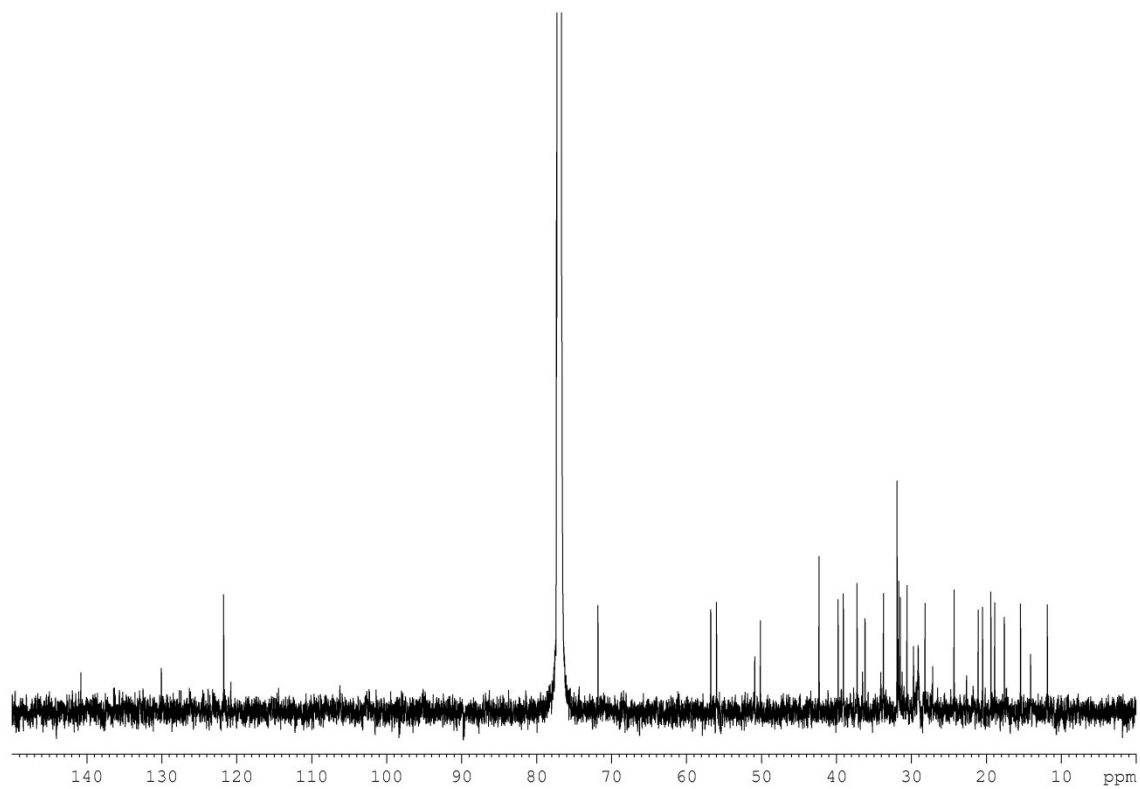



**FIGURE SM4.**  $^1\text{H}$  NMR spectrum (600 MHz,  $\text{CDCl}_3$ ) of clionasterol from *C. cryptica*.

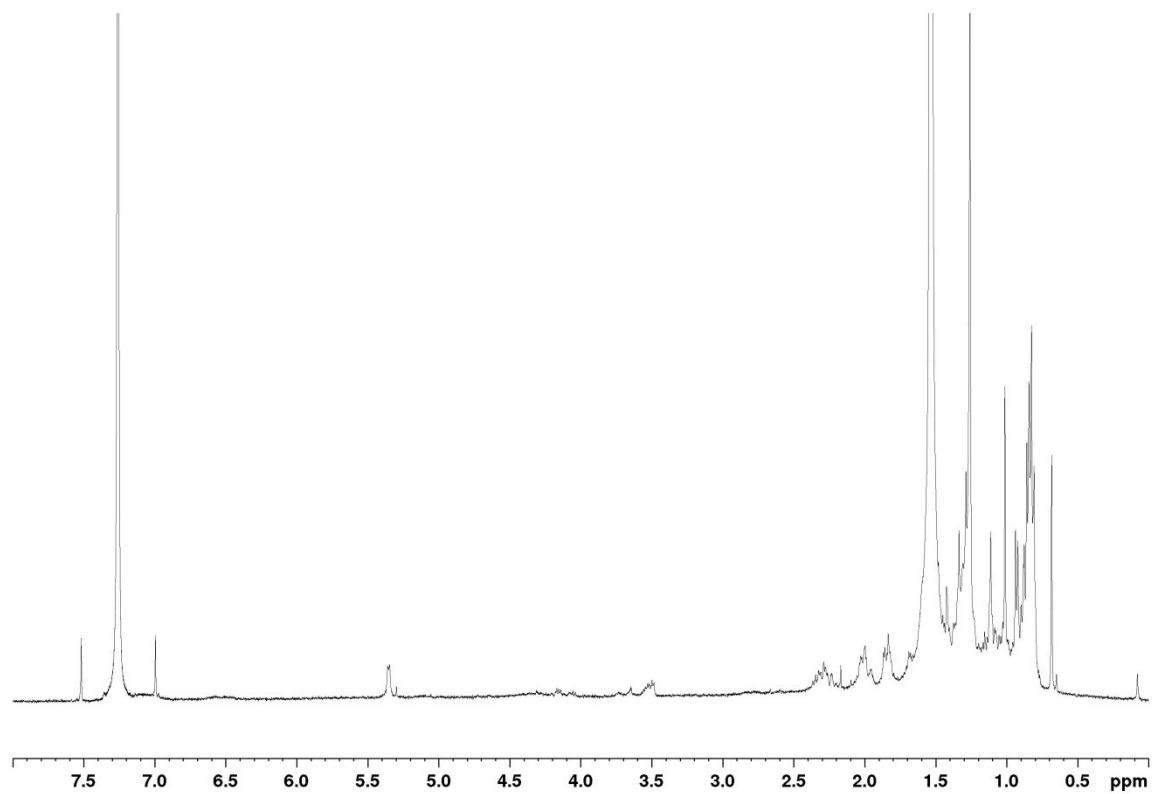

**FIGURE SM5.** COSY spectrum (600 MHz, CDCl<sub>3</sub>) of clionasterol from *C. cryptica*.

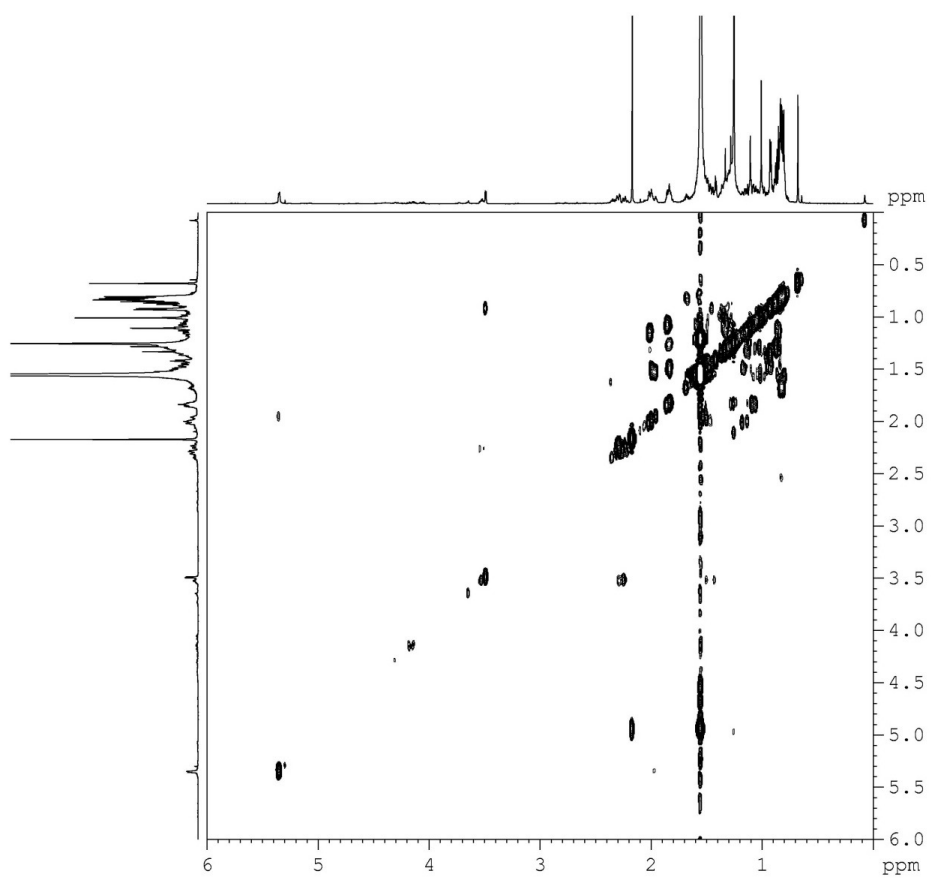

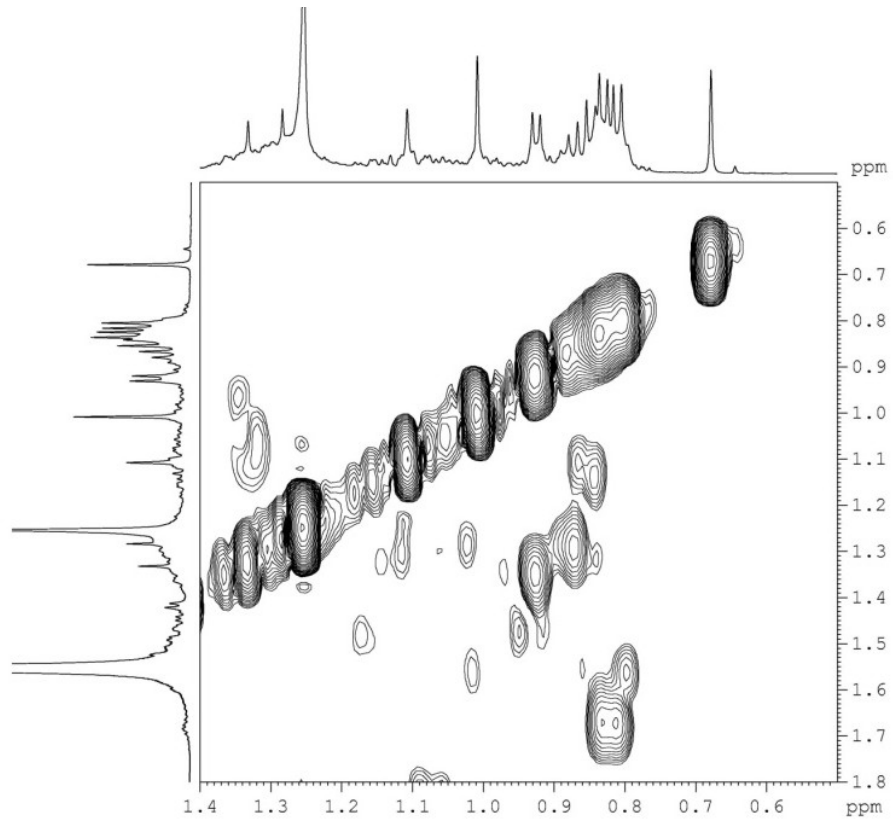

**FIGURE SM6.** HSQC spectrum (600 MHz, CDCl<sub>3</sub>) of clonasterol from *C. cryptica*.

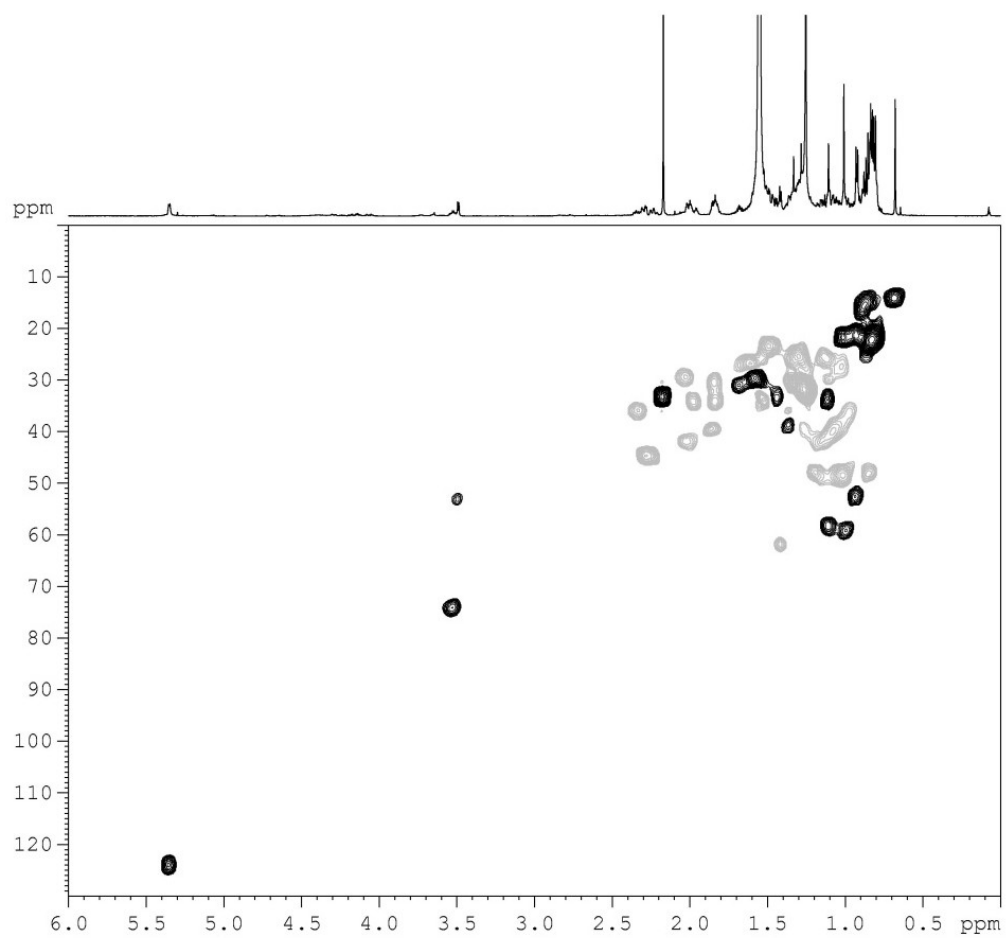

**FIGURE SM7.**  $^1\text{H}$  NMR spectrum (600 MHz,  $\text{C}_6\text{D}_6$ ) of natural fucosterol.

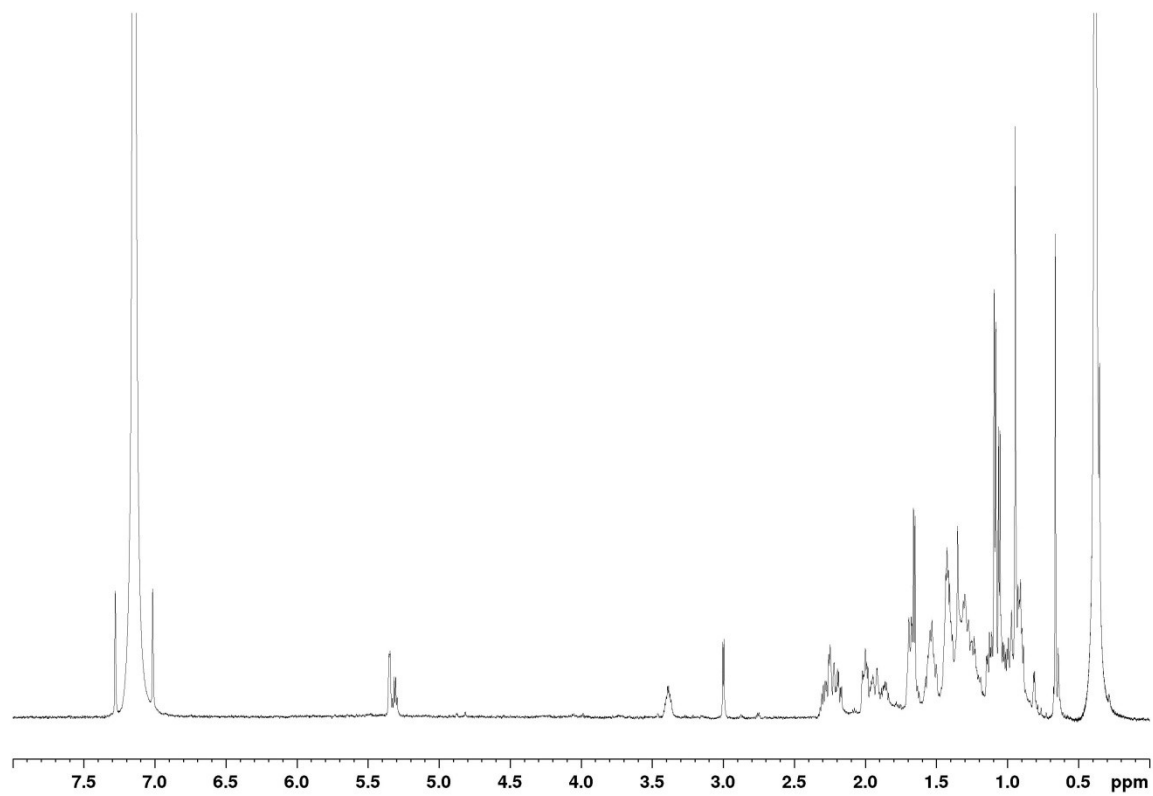

**FIGURE SM8.**  $^1\text{H}$  NMR spectrum (600 MHz,  $\text{CDCl}_3$ ) of acetyl brassicasterol from *P. tricornutum*.

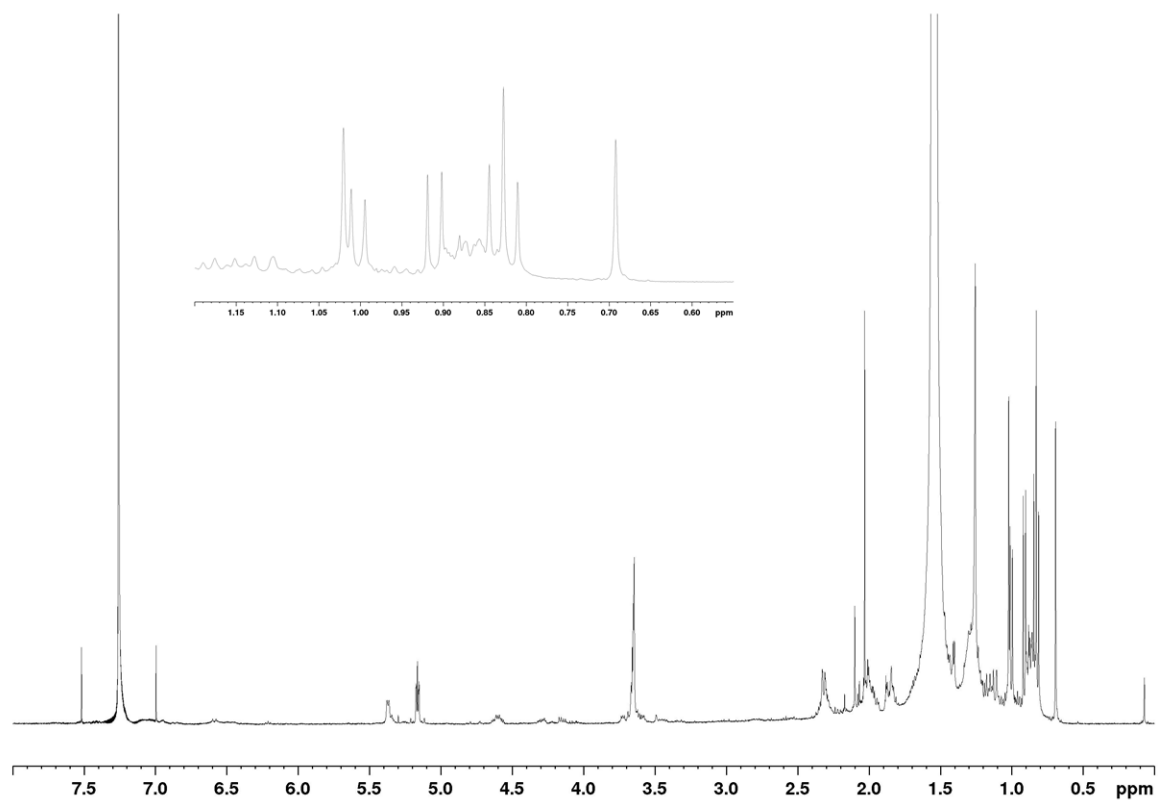

**FIGURE SM9.** COSY spectrum (600 MHz,  $\text{CDCl}_3$ ) of acetyl brassicasterol from *P. tricornutum*.

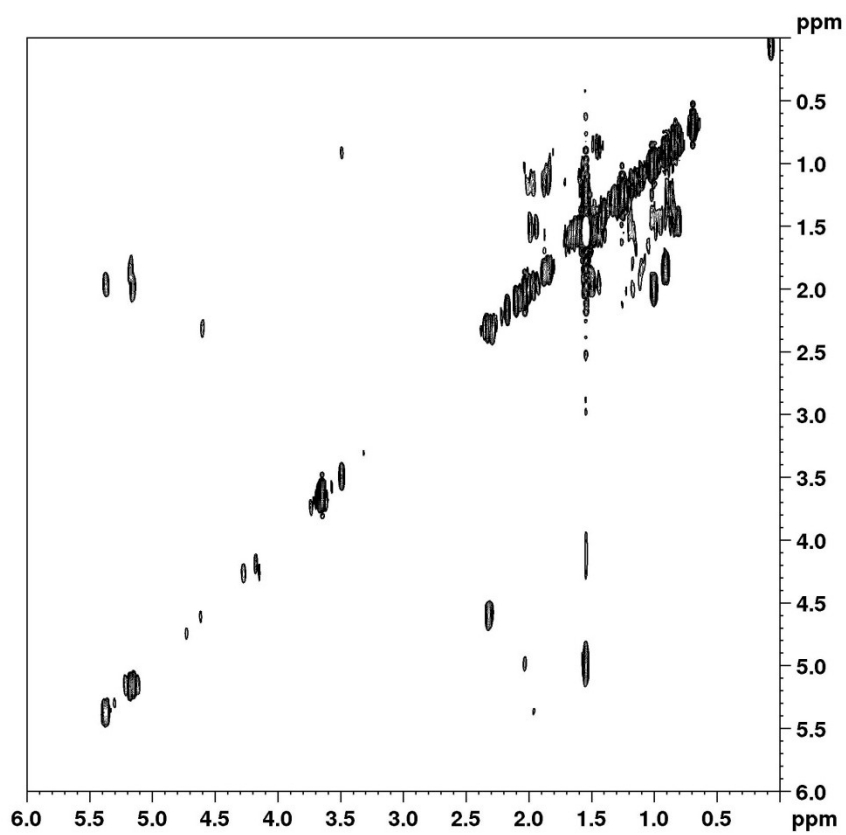

**FIGURE SM10.** Nodal sterol biosynthesis related translated transcripts comparison between *Skeletonema marinoi* (Queries) and *Cyclotella cryptica* transcriptome (Database).

- *Mevalonate Kinase: SM-MEVK (TR10489) obtains= CC-MEVK (TR35862)*

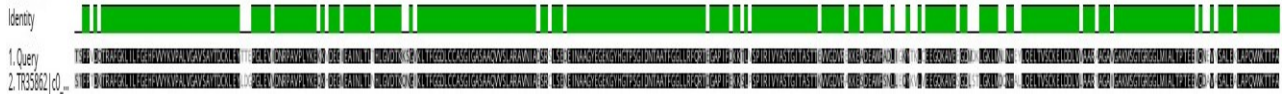

Query Coverage: 99.68%

Identities: 84.3%

Positives: 92.7%

- *Squalene synthase: SM-SQS (TR5837) obtains=CC-SQS (TR905)*

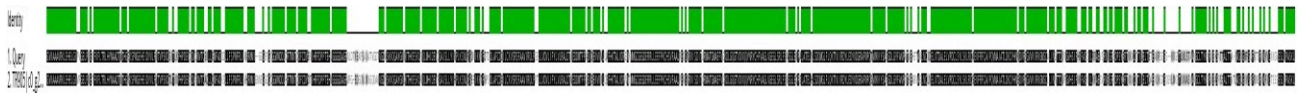

Query Coverage: 83.4%

Identities: 76.2%

Positives: 86.8%

- *Cycloartenol synthase: SM-CAS (TR12960) obtains=CC-CAS (TR3126)*

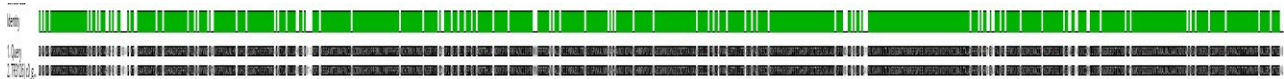

Query Coverage: 61.5%

Identities: 84.7%

Positives: 92.6%



*Cycloartenol-C-24-methyltransferase: SM-SMT1 (TR612) obtains = CC-SMT1 (TR45147)*

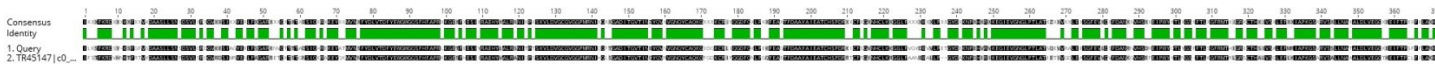

Query Coverage: 91.8%

Identities: 72%

Positives: 82.3%

- *Sterol methyl transferase: SM-SMT2 (TR11812) obtains= CC-SMT2(TR29102)*

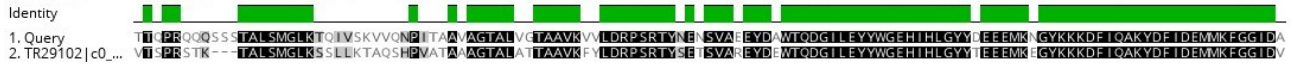

Query Coverage: 84.6%

Identities: 72.7%

Positives: 78.5%

- *Sterol 14 demethylase: SM-CYP (TR7602) obtains= CC-CYP (TR23734)*

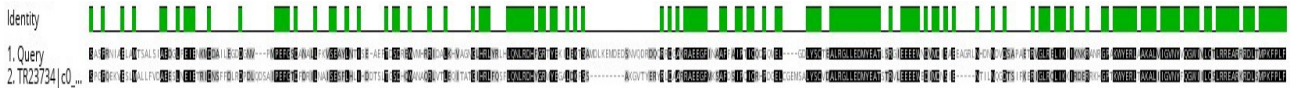

Query Coverage: 68.2%

Identities: 47%

Positives: 64.8%

- *7 dehydrocholesterol reductase: SM-DWF5 (TR2636) obtains = CC-DWF5 (TR24068)*

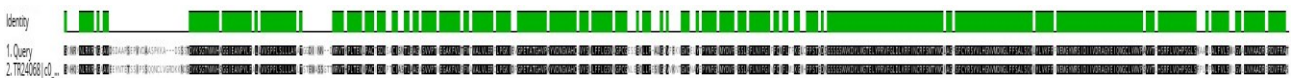

Query Coverage: 99.5%

Identities: 74%

Positives: 83.7%

- *Delta(24(24(1)))-sterol reductase: SM-24SR (TR213) obtains= CC-24SR (TR29411)*

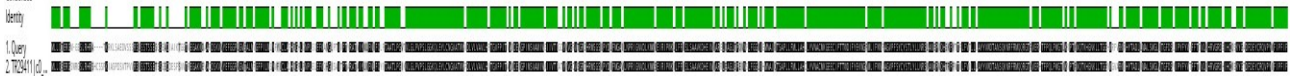

Query Coverage: 100%

Identities: 75.5%

Positives: 85.2%

Alignments and outputs were performed using the Geneious software (Kearse et al., 2012). Blast investigation were performed using *S.marinoi* translated transcripts as queries; database was constructed using *C. cryptica* transcriptome. Reverse investigation were performed to confirm the results. This investigation revealed equal results (Data not showed).

**Kearse M, Moir R, Wilson A, Stones-Havas S, Cheung M, Sturrock S et al.** 2012. Geneious Basic: An integrated and extendable desktop software platform for the organization and analysis of sequence data. *Bioinformatics* 15;28 (12) 1647-9.

**FIGURE SM11.** Nodal sterol biosynthesis related translated transcripts alignments between *Skeletonema marinoi* and *Solanum lycopersicum*

- *Cycloartenol synthase, SM-CAS (TR12960).*

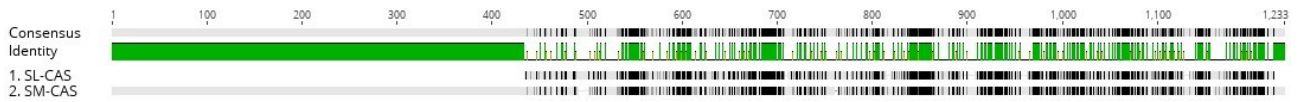

Identities: 43.7%

Positives: 58.2%

- *Cycloartenol-C-24-methyltransferase, SM-SMT1 (TR612)*

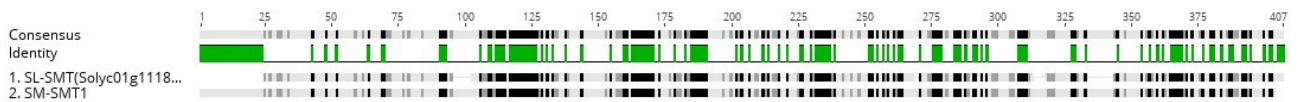

Identities: 32.4%

Positives: 50%

and

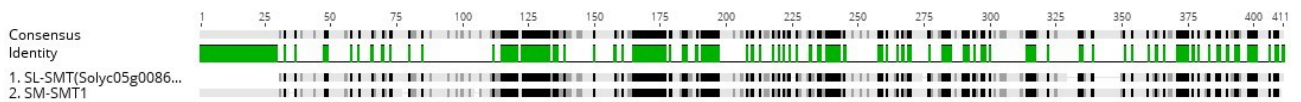

Identities: 34.2%

Positives: 50.4%

- *Sterol methyl transferase, SM-SMT2 (TR11812)*

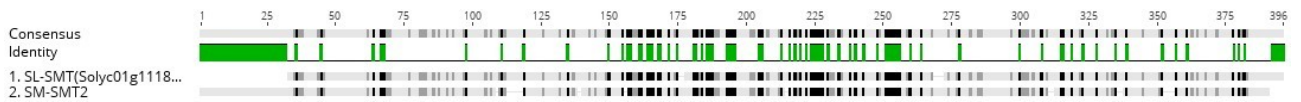

Identities: 20.6%

Positives: 39%

and

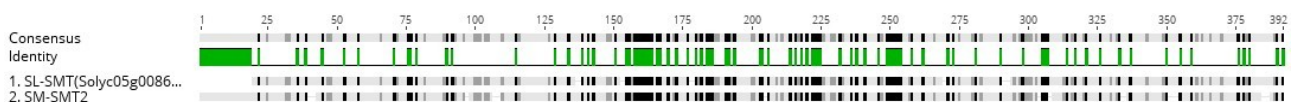

Identities: 23.3%

Positives: 39.7%

- *C-4 sterol methylsterol monooxygenase, SM-SMO(TR11964)*

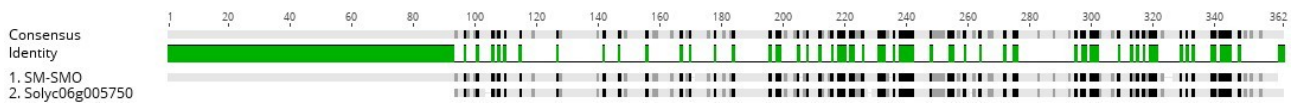

Identities: 25%

Positives: 41%

- *7 dehydrocholesterol reductase, SM-DWF5 (TR2636)*

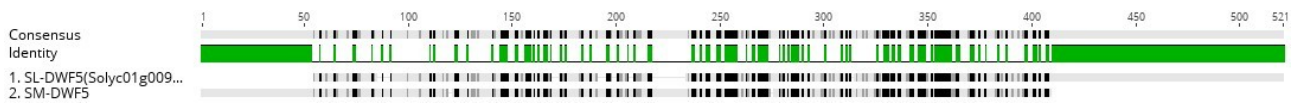

Identities: 31%

Positives: 47.3%

**FIGURE SM12.** Nodal sterol biosynthesis related translated transcripts alignments between *Cyclotella cryptica* and *Solanum lycopersicum*

- *Cycloartenol synthase, CC-CAS (TR3126).*

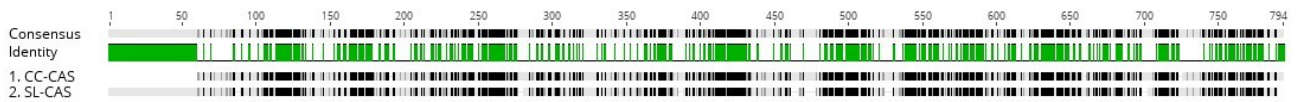

Identities: 46%

Positives: 60.8%

- *Cycloartenol-C-24-methyltransferase, CC-SMT1 (TR45147)*

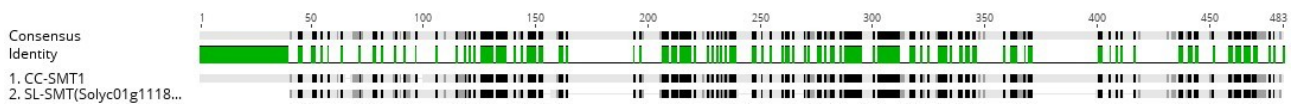

Identities: 33%

Positives: 45.2%

and

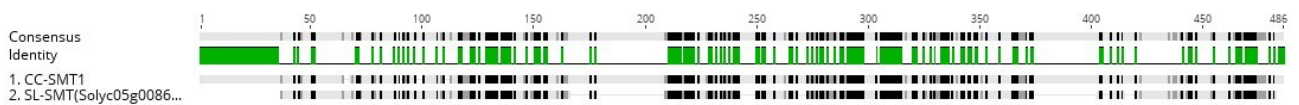

Identities: 33%

Positives: 45.9%

- *Sterol methyl transferase, CC-SMT2 (TR29102)*

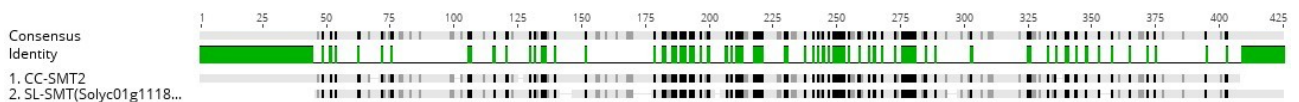

Identities: 21.8%

Positives: 36.9%

and

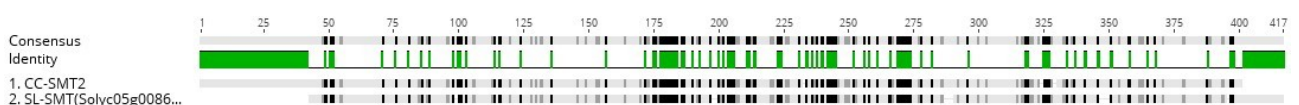

Identities: 22.6%

Positives: 37.6%

- *7 dehydrocholesterol reductase, CC-DWF5 (TR24068)*

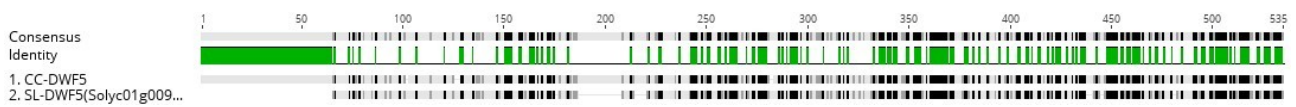

Identities: 35.5%

Positives: 52.6%

Alignments and outputs were performed using the Geneious software Alignments and outputs were performed using the Geneious software (Kearse et al., 2012)

**Kearse M, Moir R, Wilson A, Stones-Havas S, Cheung M, Sturrock S et al.** 2012. Geneious Basic: An integrated and extendable desktop software platform for the organization and analysis of sequence data. *Bioinformatics* 15;28 (12) 1647-9.
